# Supplementary material for: TAD conservation in vertebrate genomes is driven by stabilising selection.
Source: Research Square preprint supplement (doi:10.21203/rs.3.rs-5809117/v1), 2025-04-03
Supplement: Supplementary file 1 [file 174087411a85f437f10b846f.docx]

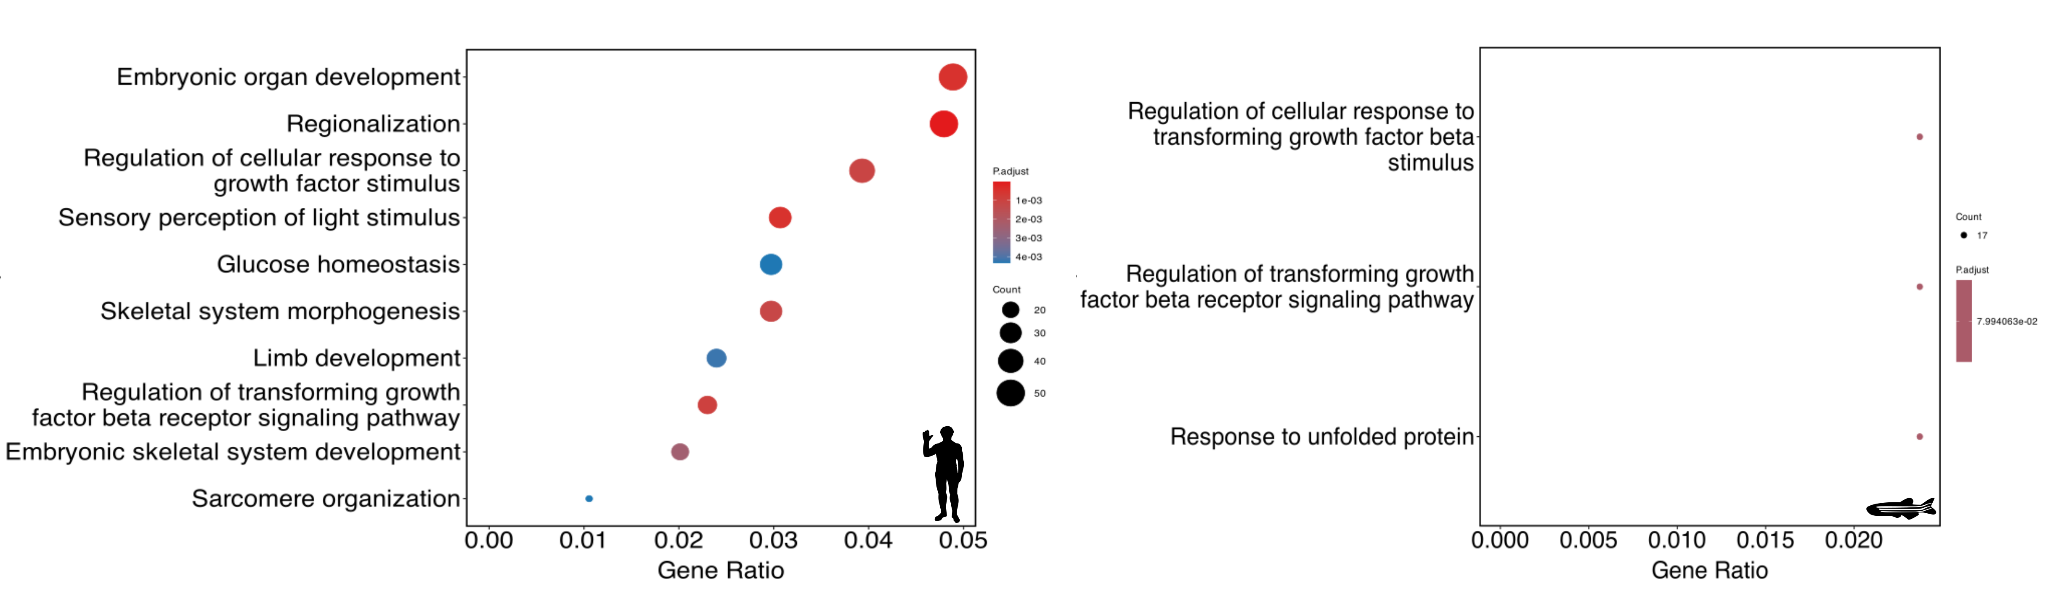


**Figure S1** GO terms enriched in vertebrates’ alignment.


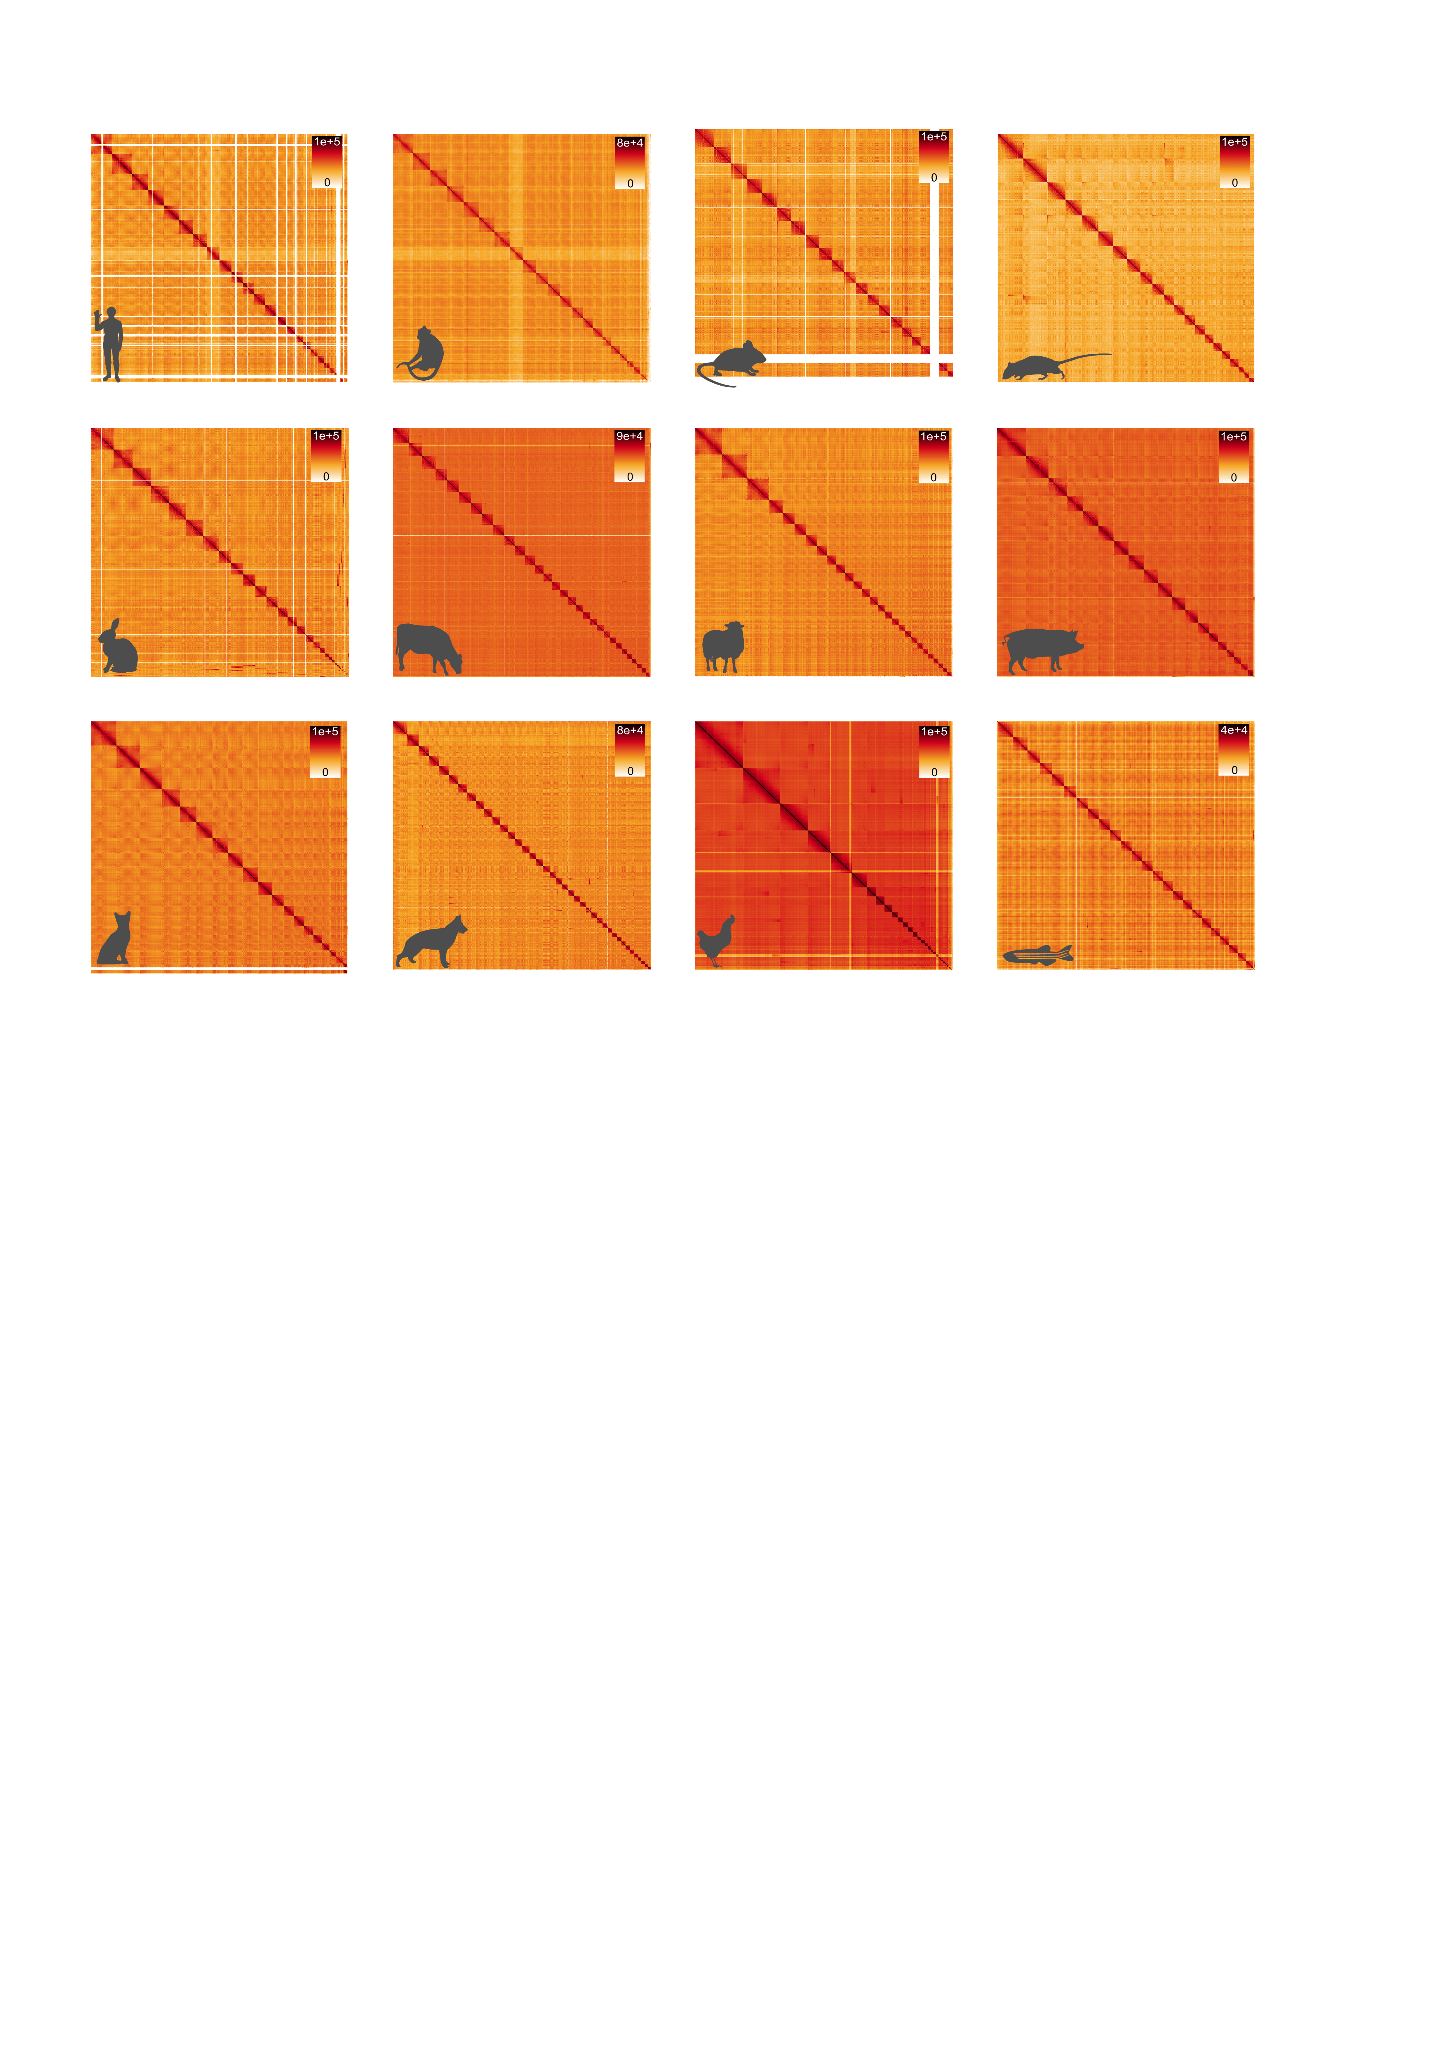


**Figure S2** Panel displaying Hi-C contact maps for the entire genome of each of the 12 vertebrate species included in the study.


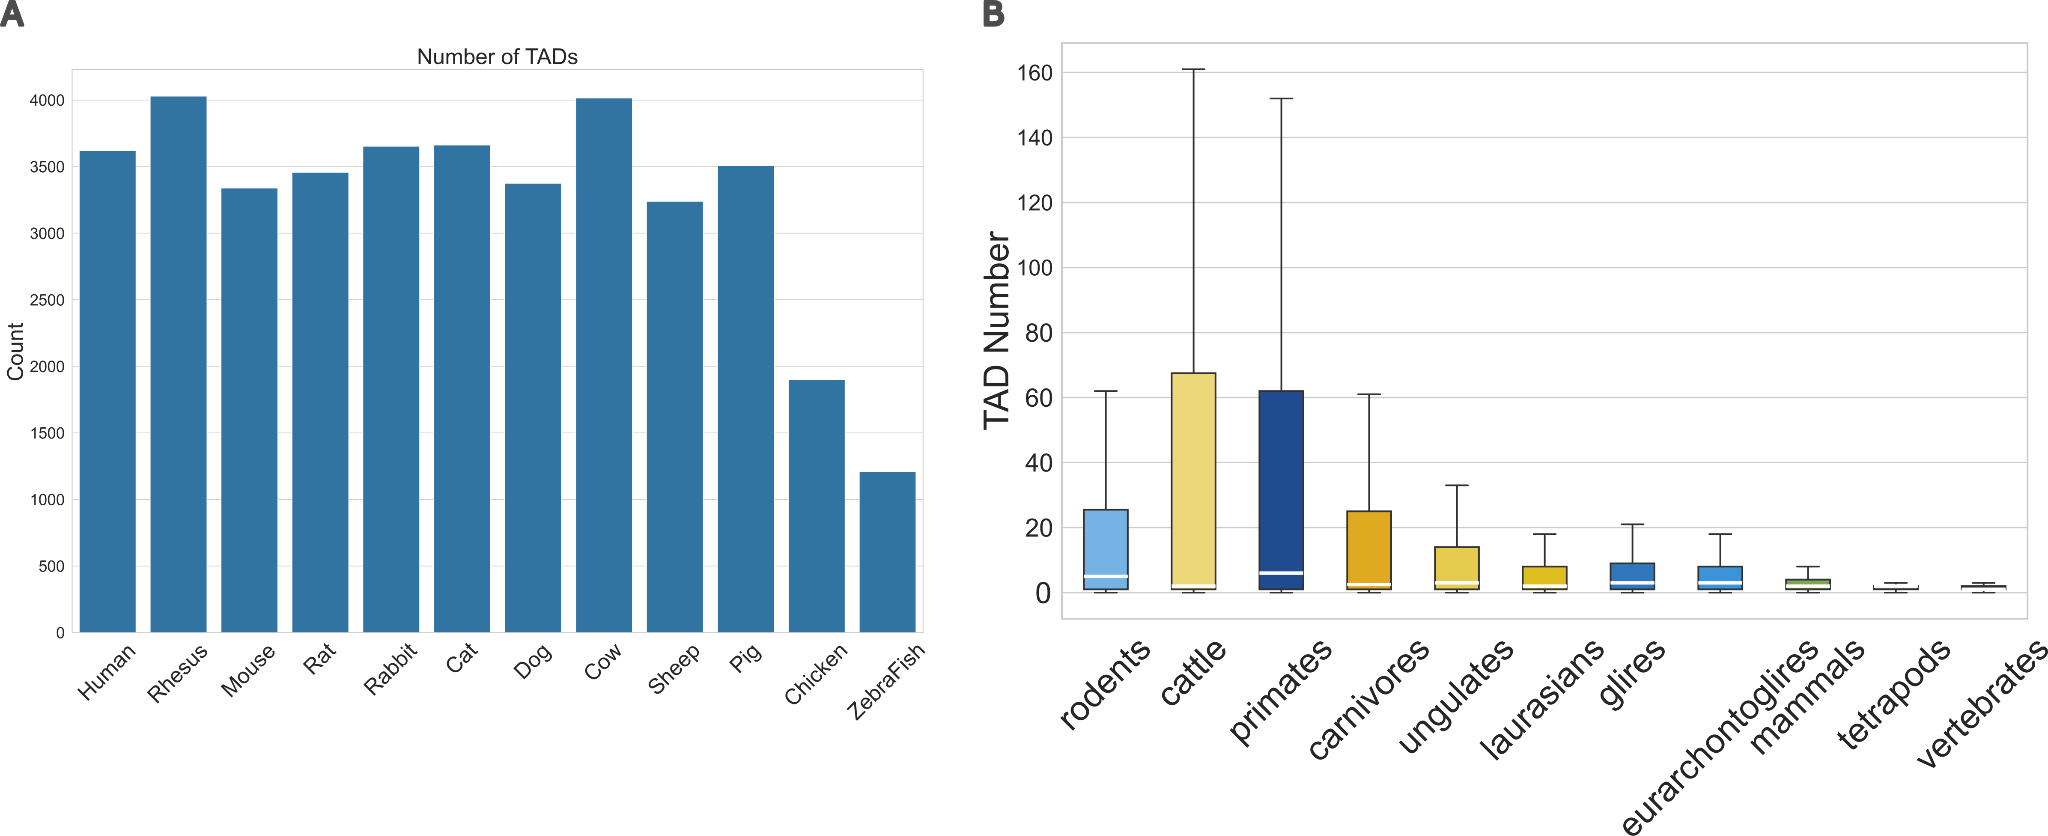


**Figure S3** **A** Total number of Topologically Associating Domains (TADs) identified in each species. **B** Distribution of TADs within syntenic blocks across different clades.


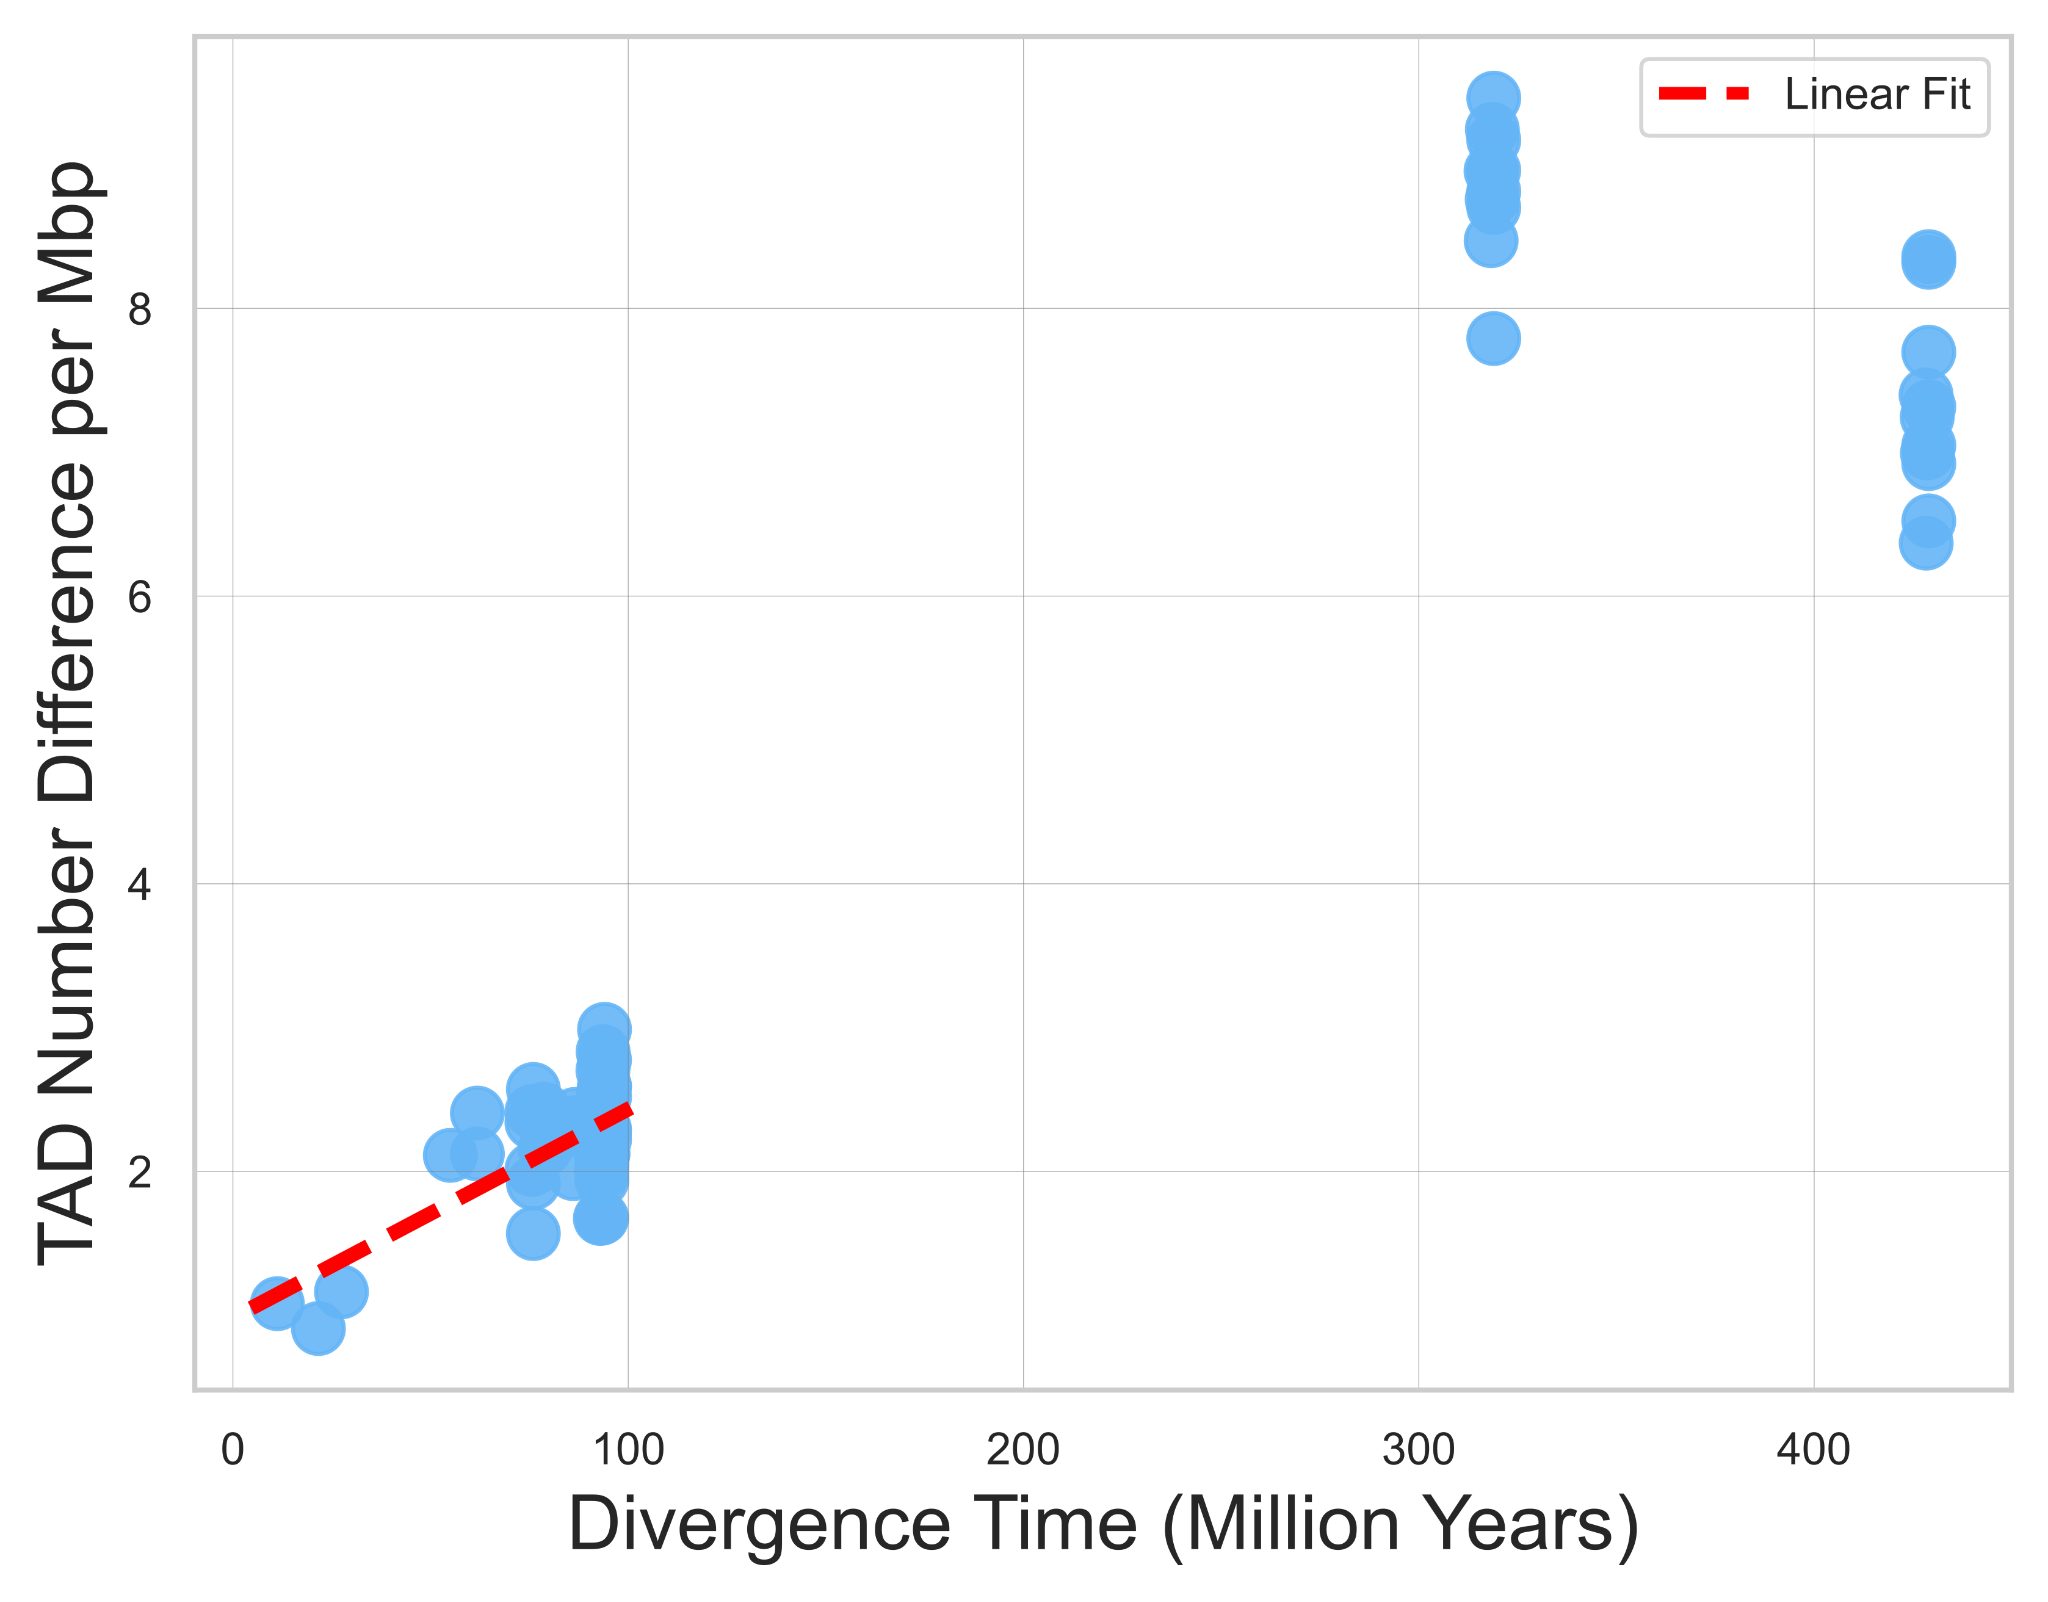


**Figure S4** Scatterplot showing the difference in TAD number per Mbp within syntenic blocks as a function of evolutionary distance between species. As evolutionary distance increases, differences in TAD number become more pronounced. The red dashed line represents linear fit to the mammalian species.

**
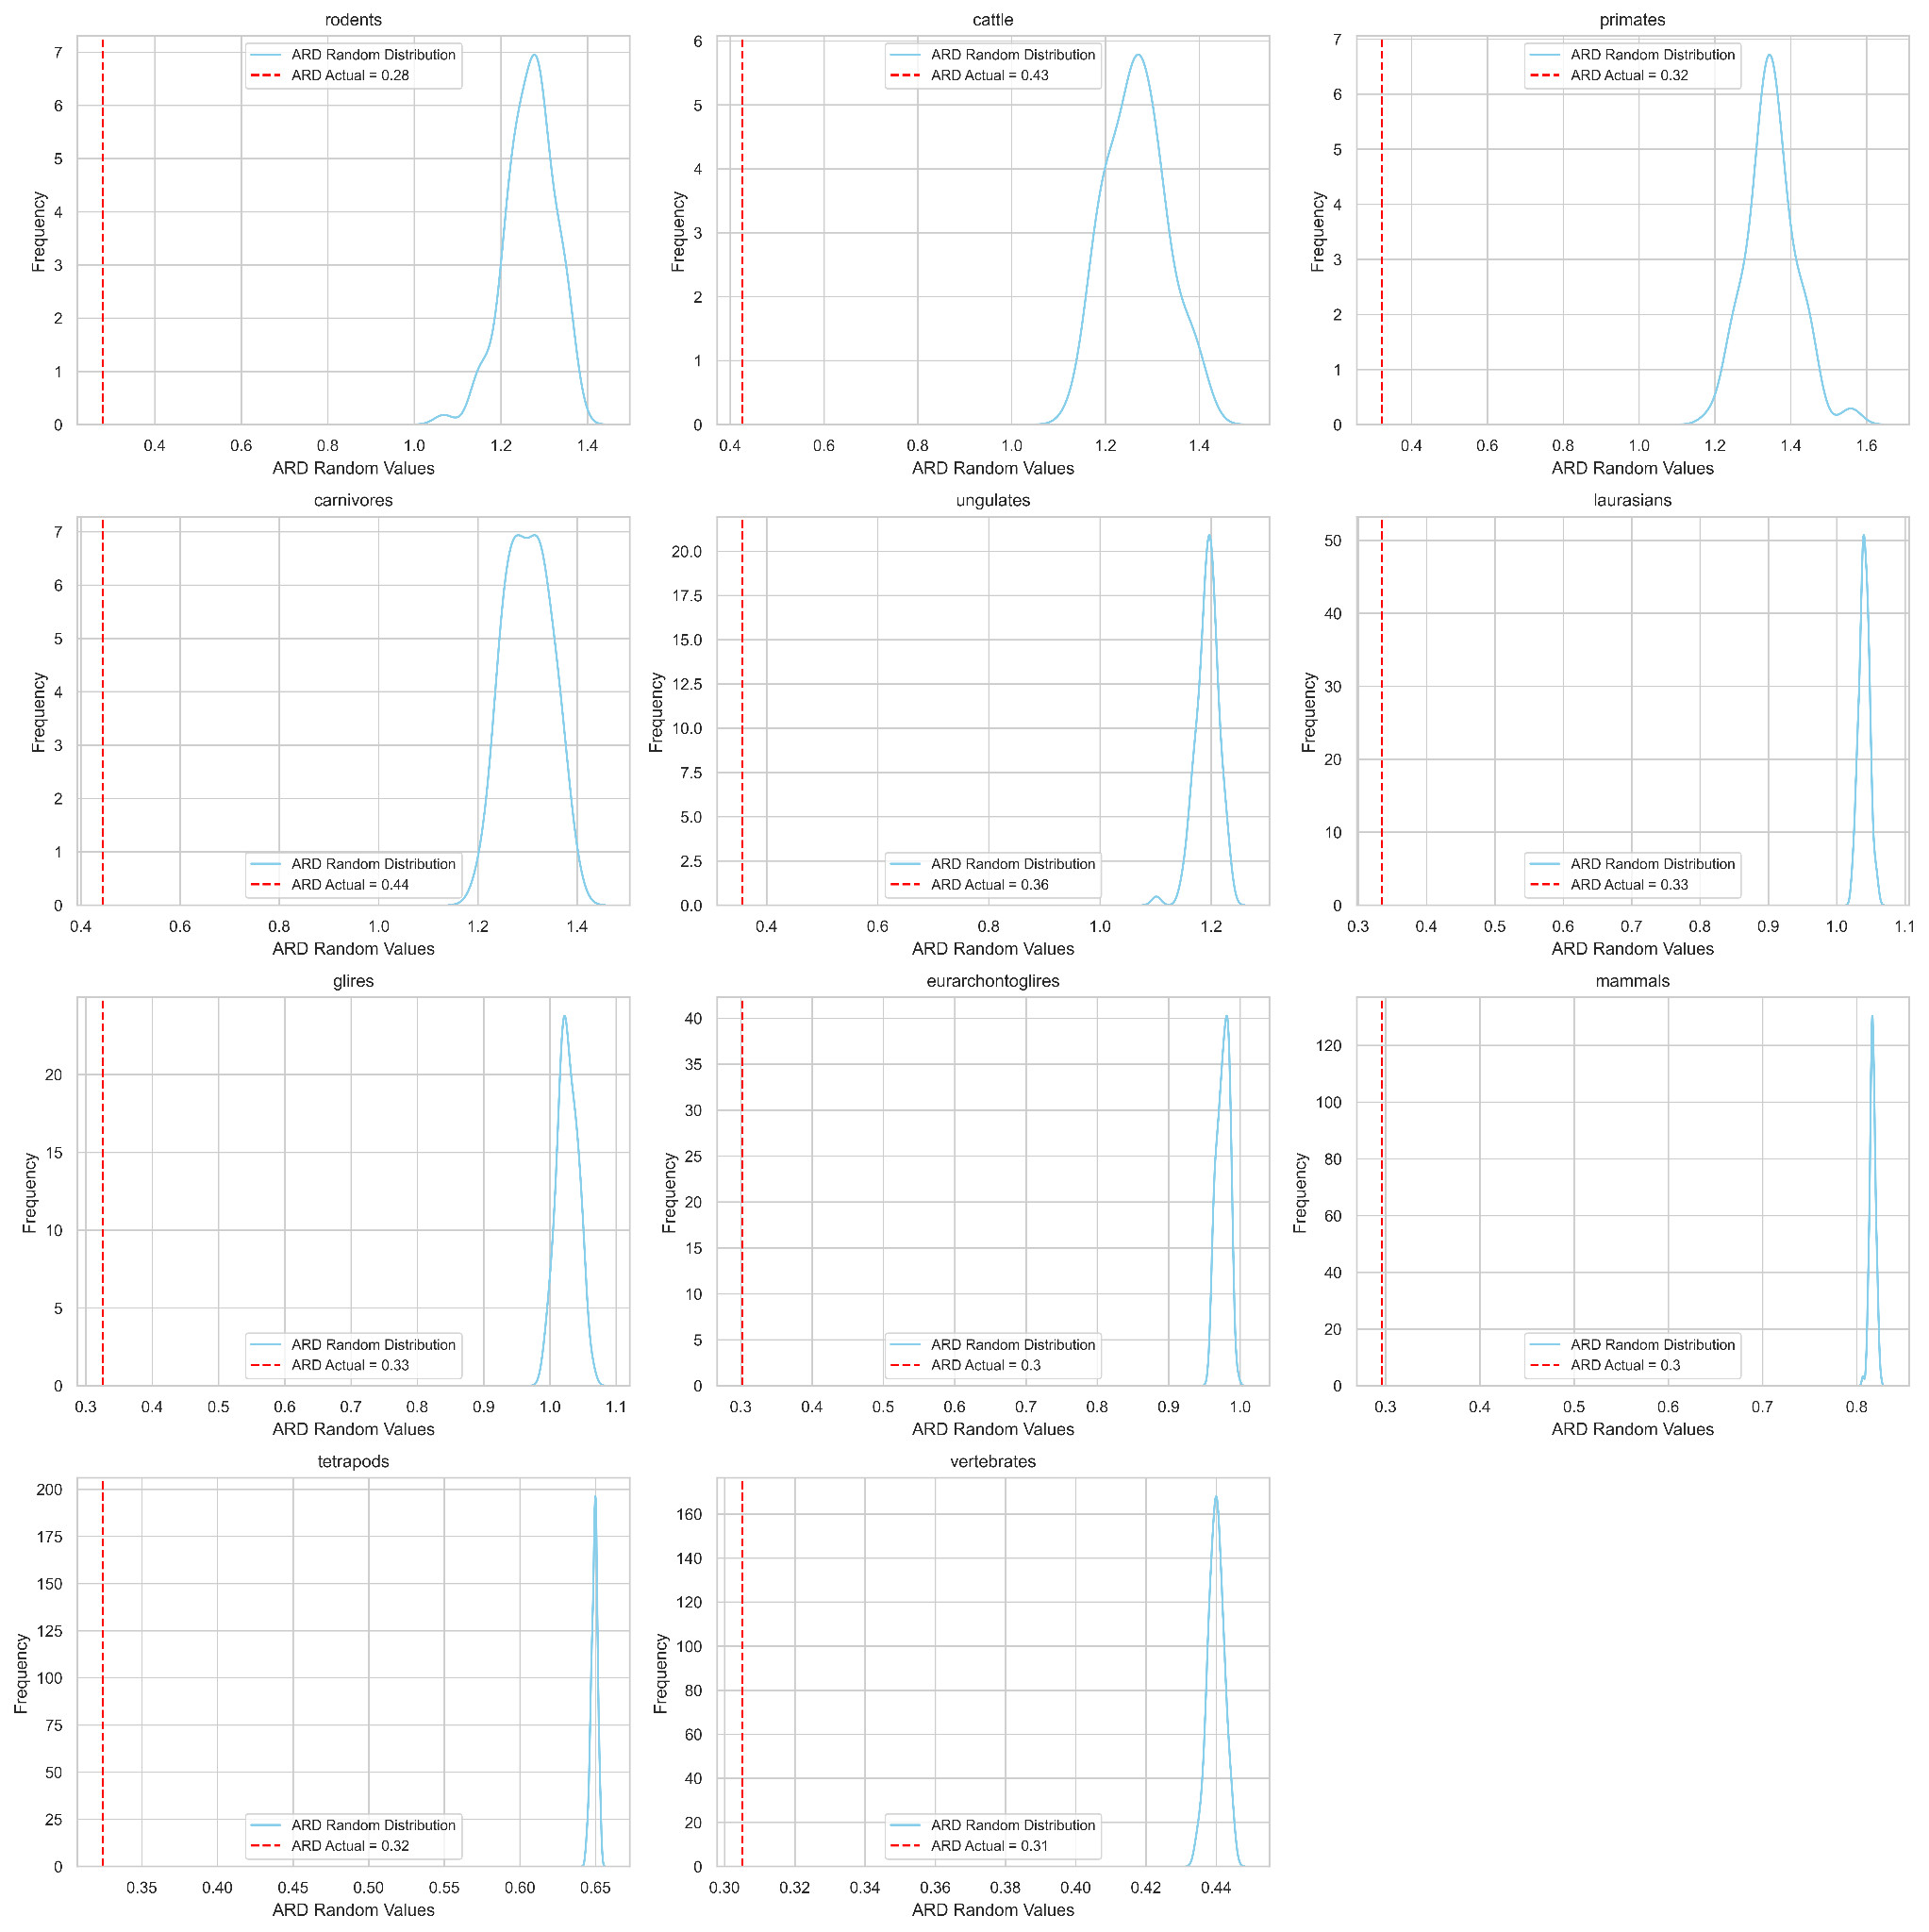
**

**Figure S5** Distribution of 1,000 randomly generated ARD for each clade. The red vertical line represents the observed ARD value.


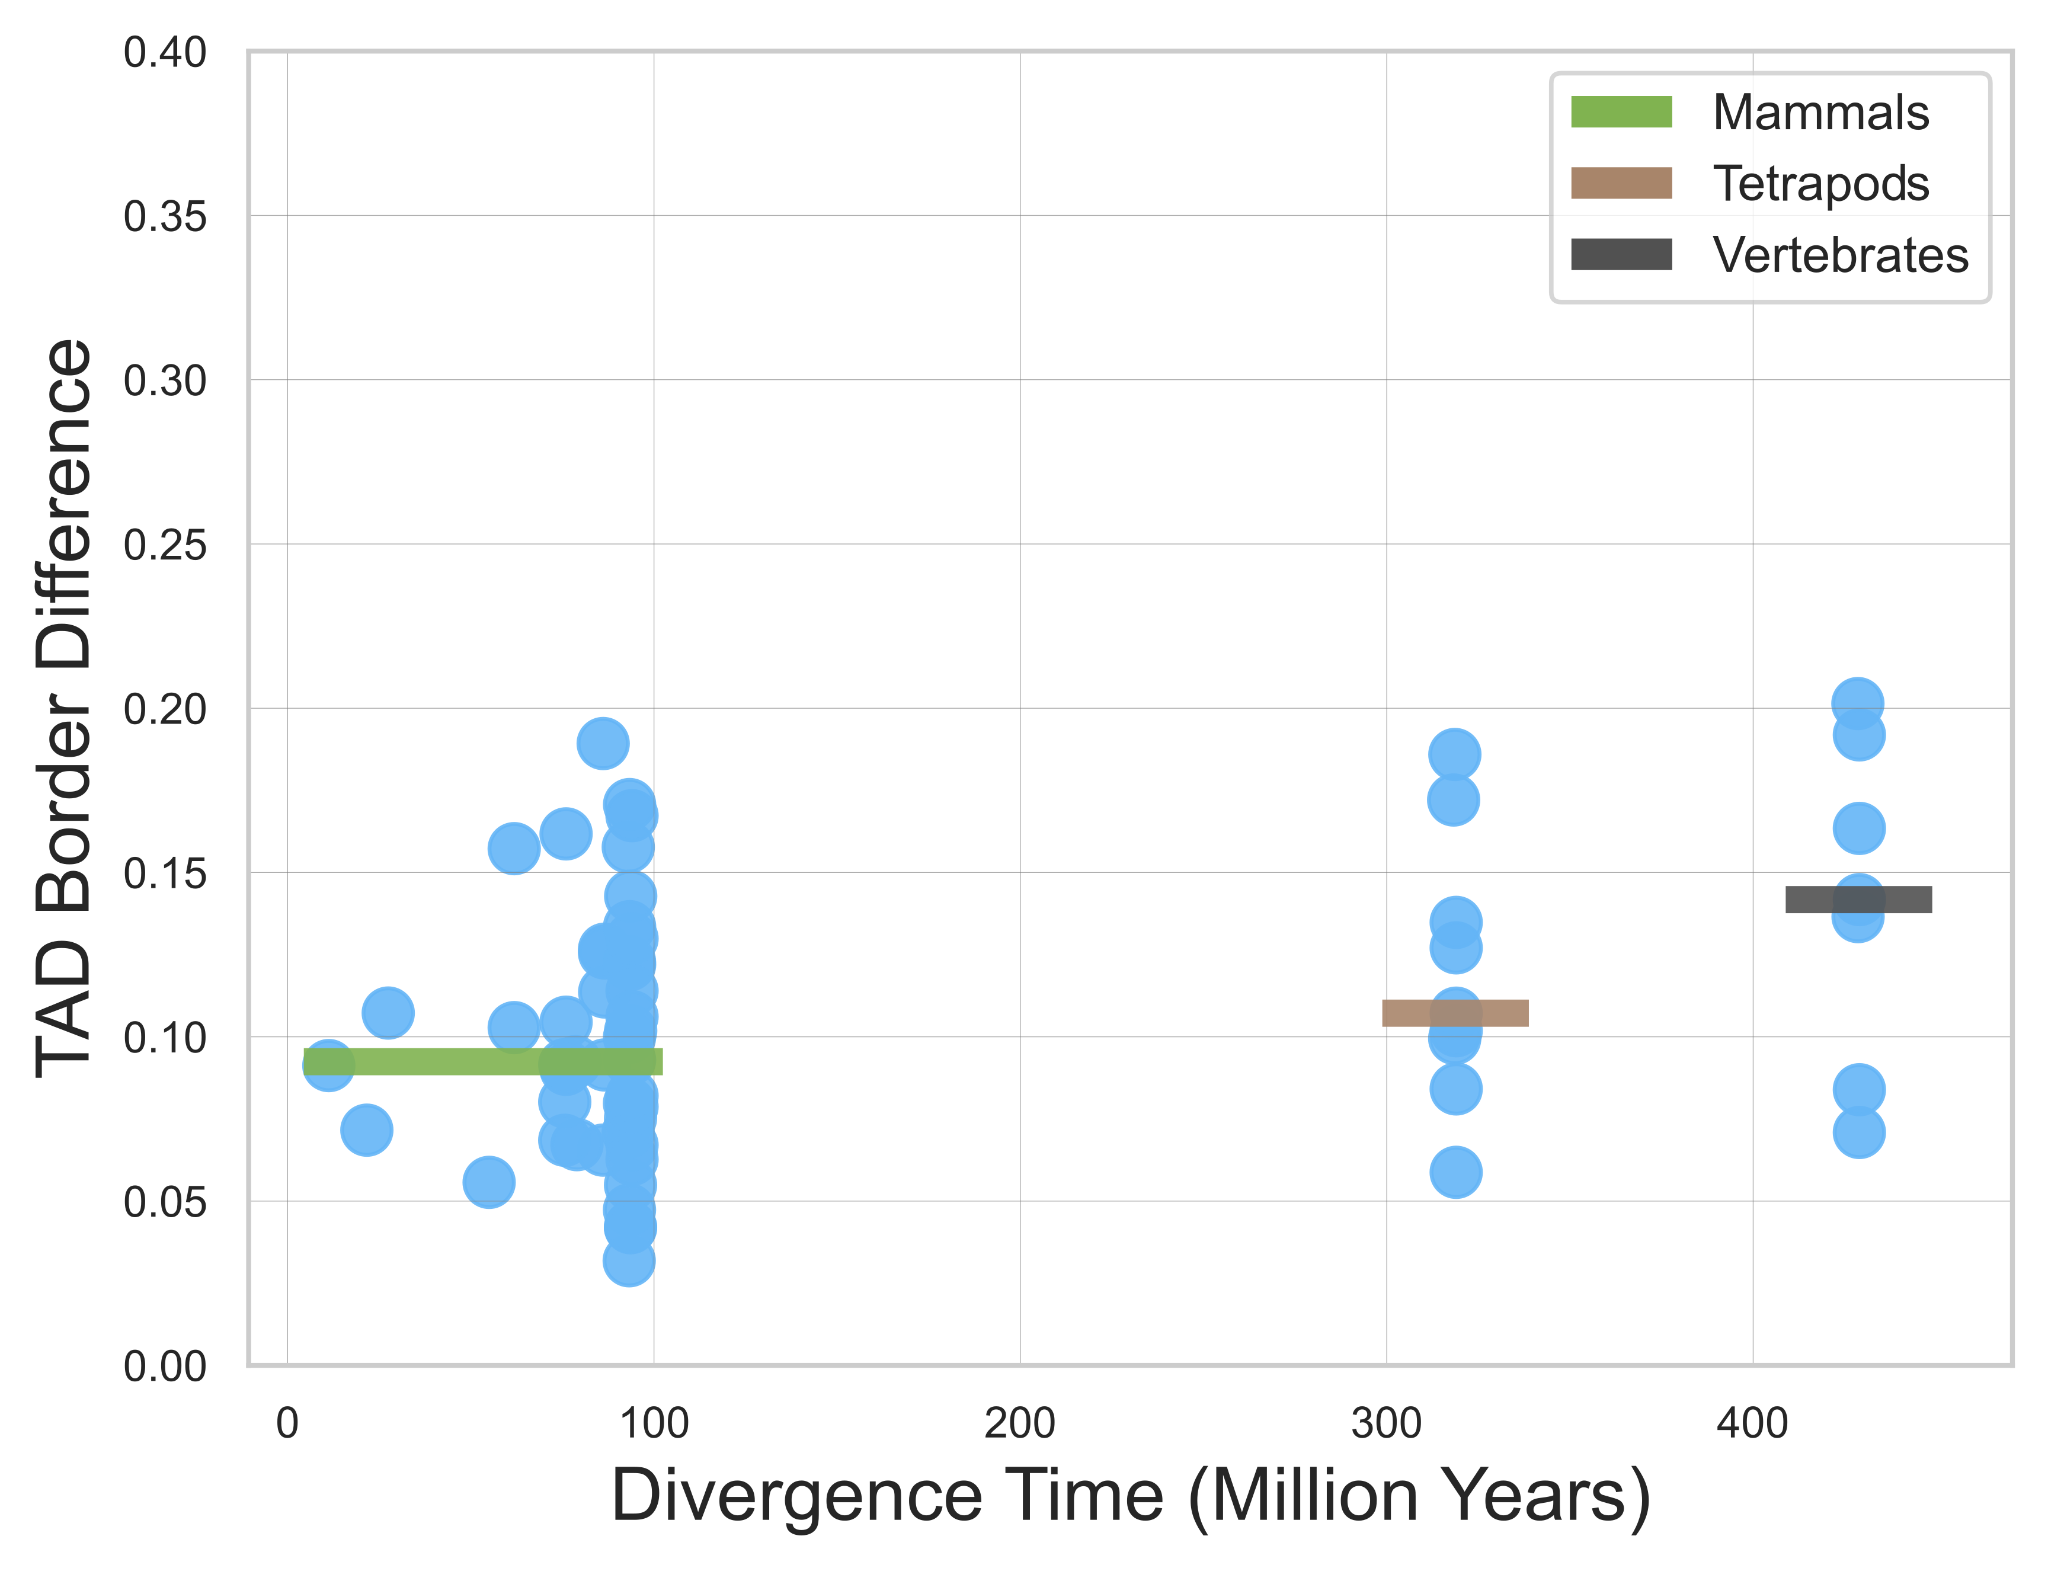


**Figure S6** Scatterplot showing the difference in TAD borders within syntenic blocks as a function of evolutionary distance between species. The three lines represent the mean difference in three different clades: mammals (green), tetrapods (brown), and vertebrates (black).

**
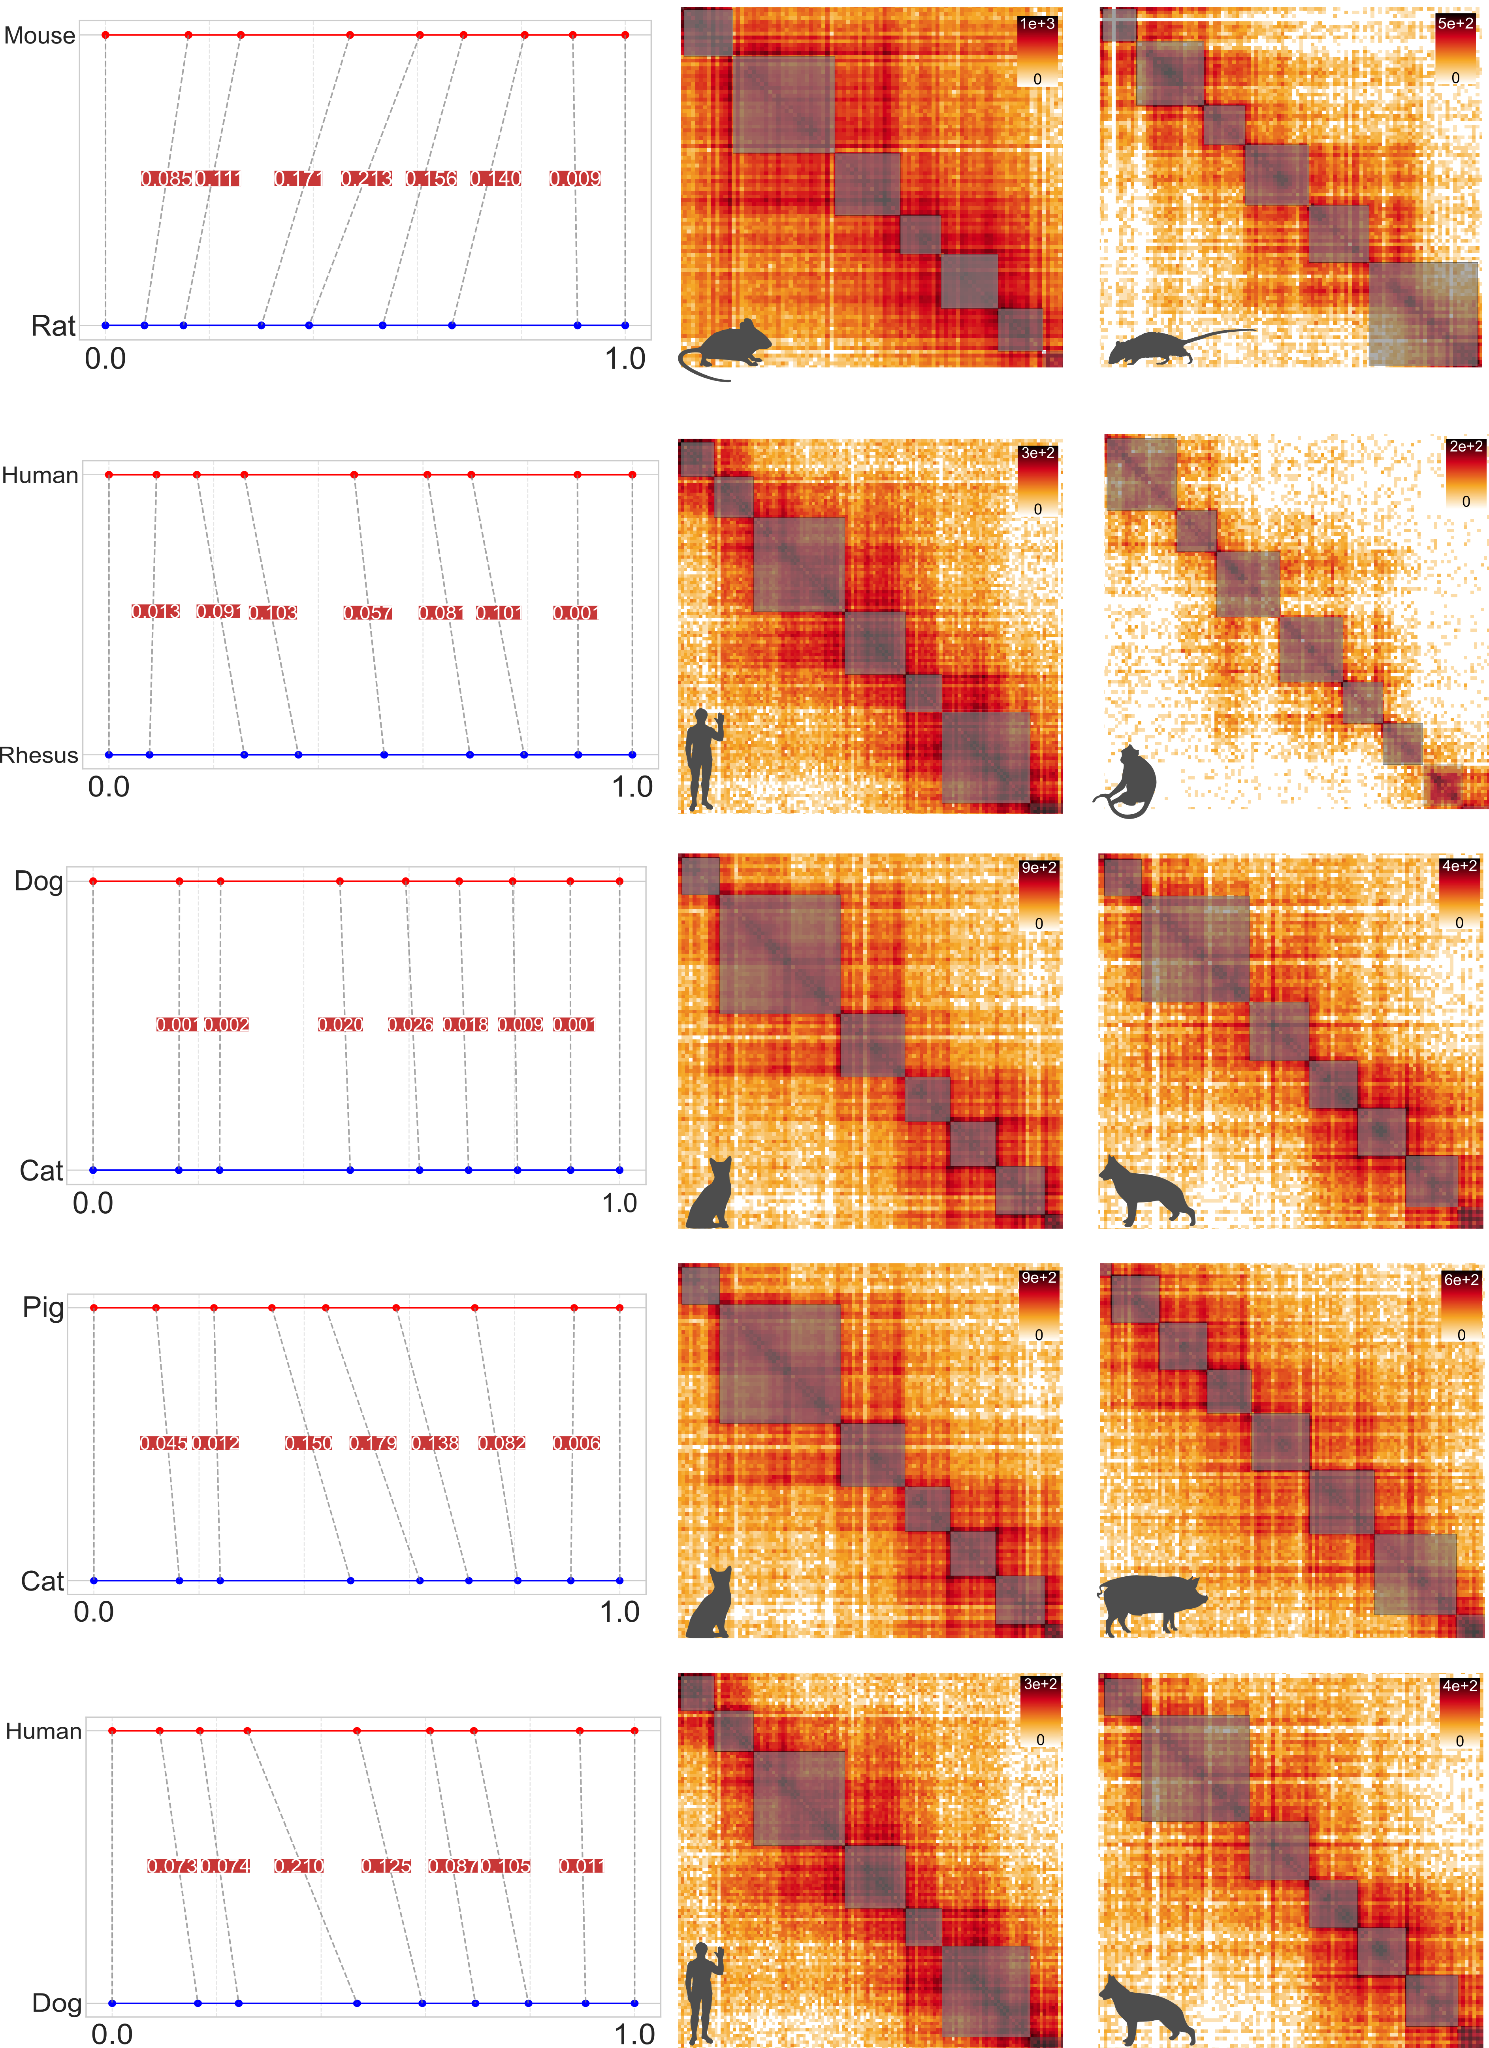
**

**Figure S7:** Comparison of the SIX2/3 cluster across different species pairs, including rodents, primates, carnivores, laurasians, and mammals. Each row represents a distinct species pair from these clades. On the left side of the plot, TAD borders within the syntenic block are shown in the range between 0 and 1, along with the corresponding differences between the borders. On the right side, the contact matrices for each species in the pair.


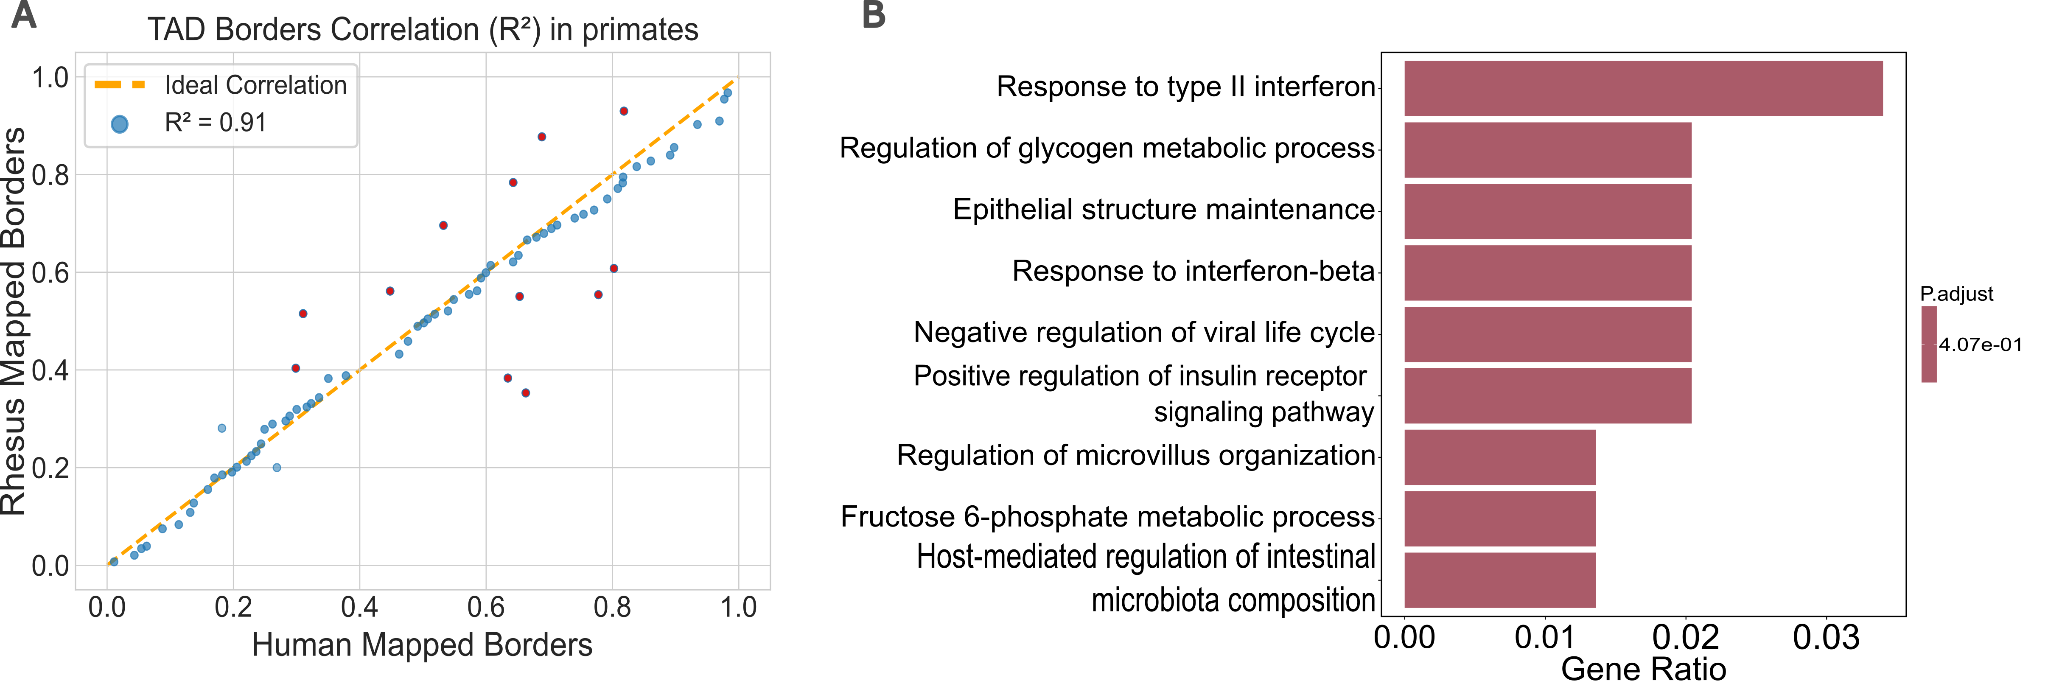


**Figure S8 A** Scatter plot showing all the TAD borders of syntenic blocks with the same number of TADs in the primates alignment. Red dots represent lowly mapped borders. **B** GO term analysis for genes in syntenic blocks associated with lowly mapped borders in primates. These GO terms are not significantly enriched.


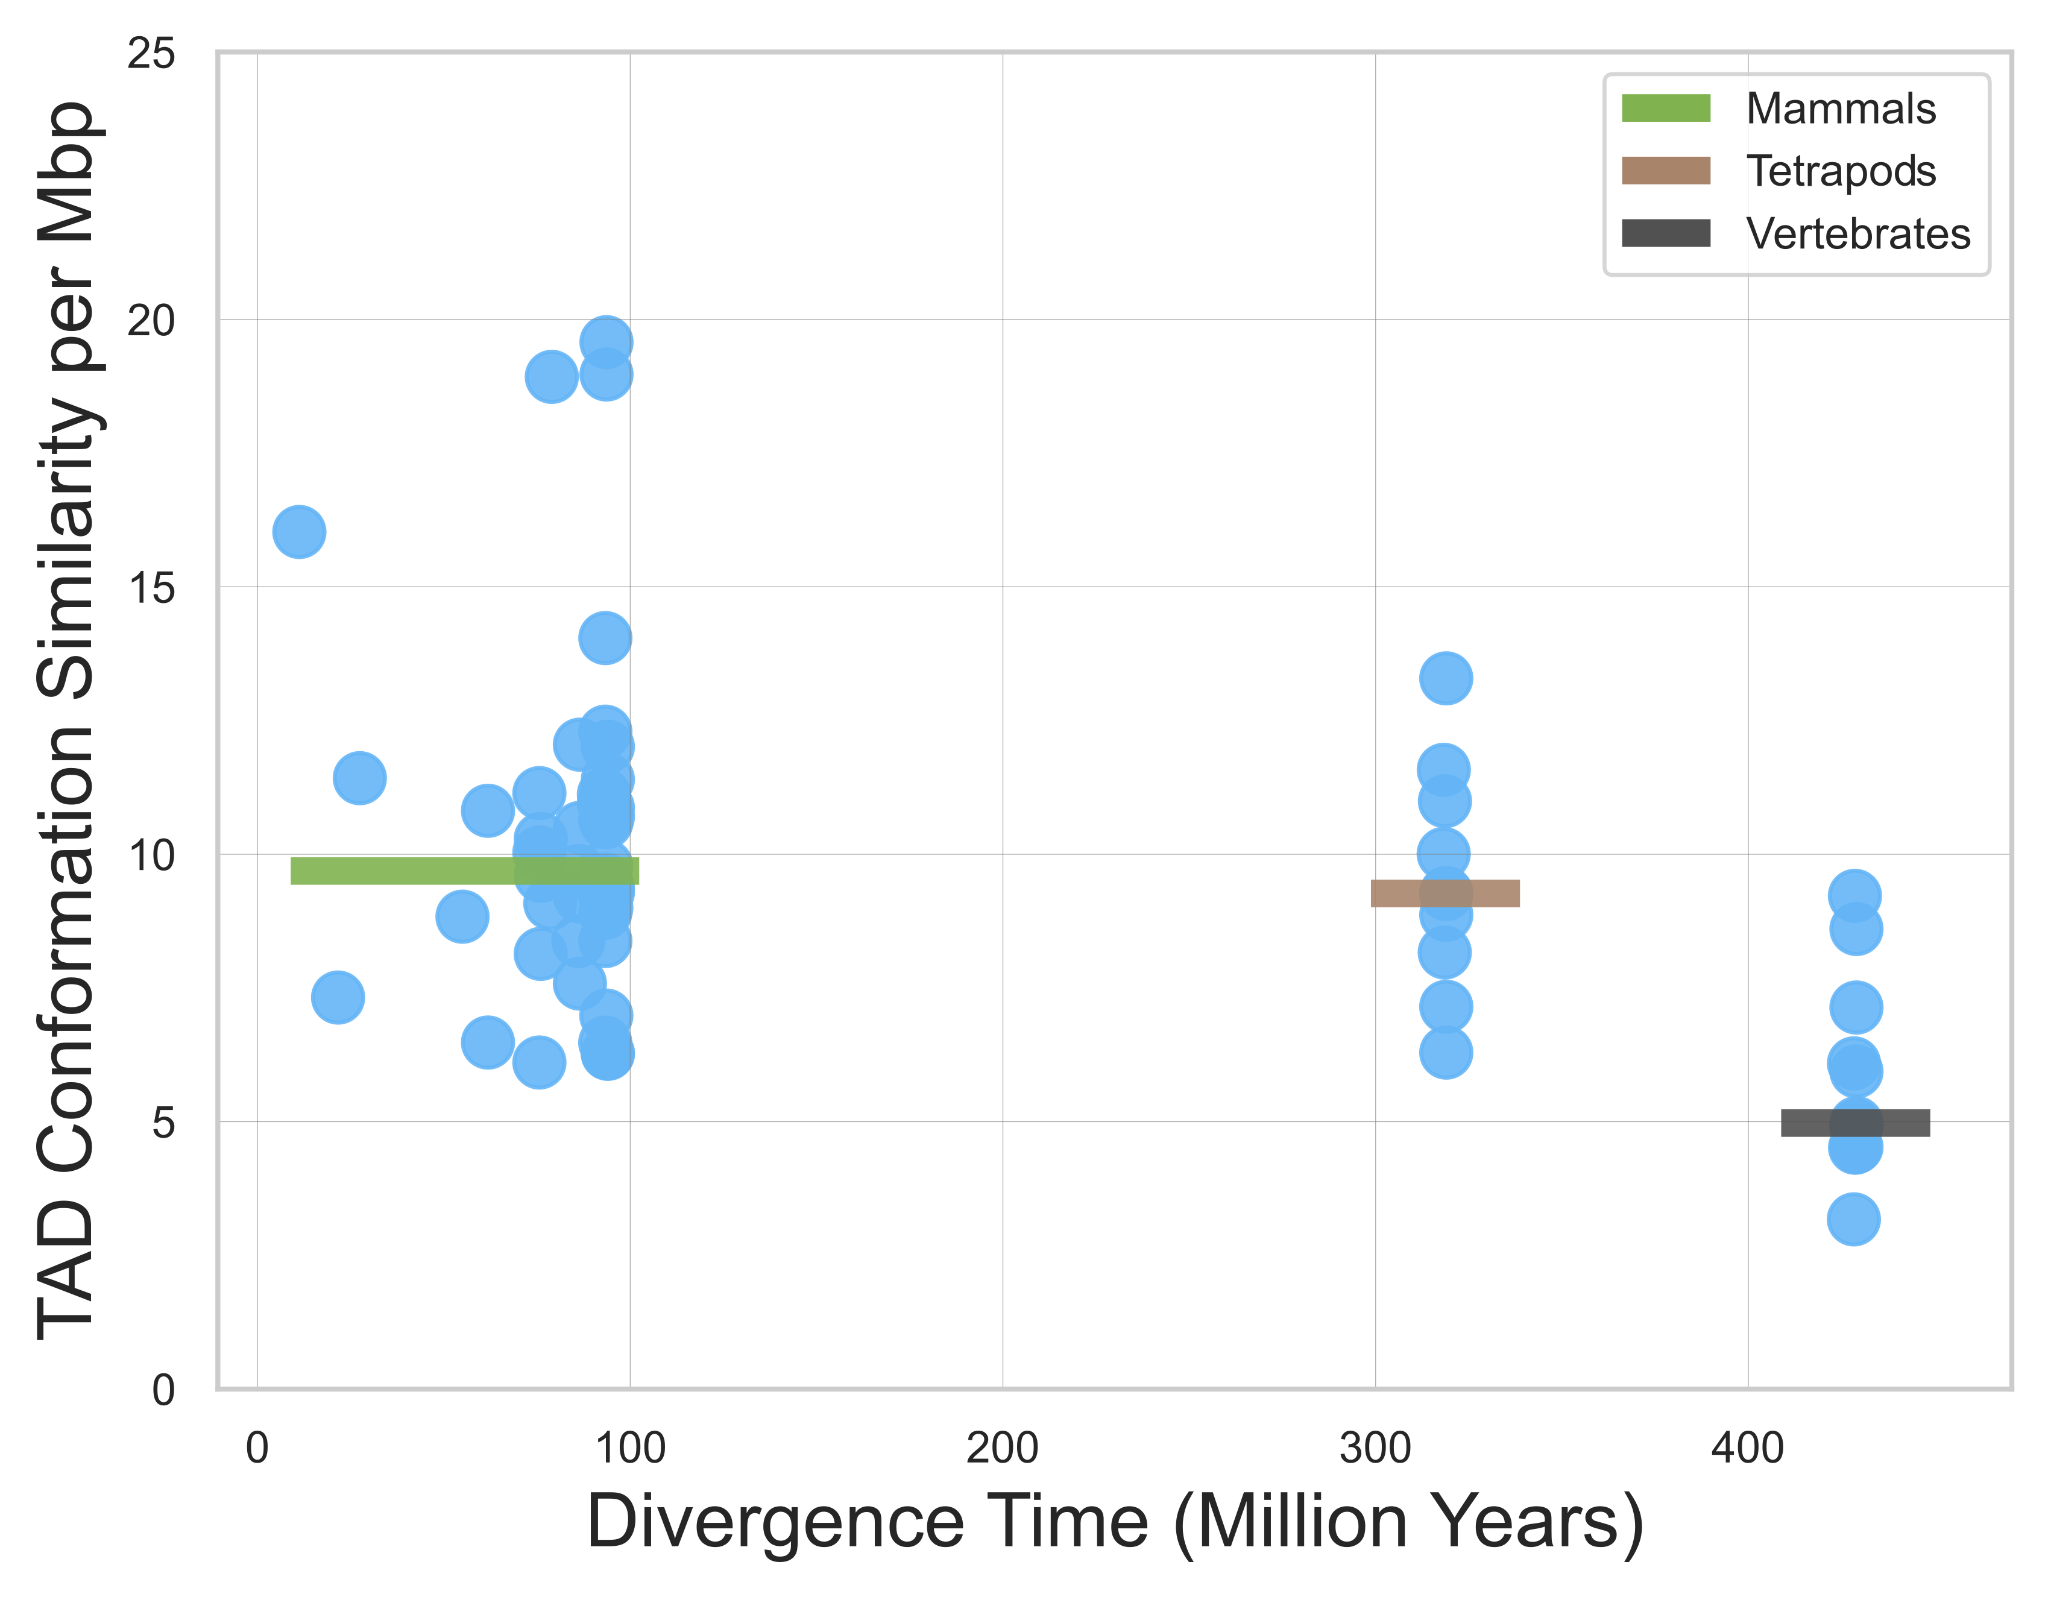


**Figure S9** Scatterplot showing the similarity in TAD-Gene conformation within syntenic blocks as evolutionary distance between species increases. The three lines represent the mean value in three different clades: mammals (green), tetrapods (brown), and vertebrates (black).


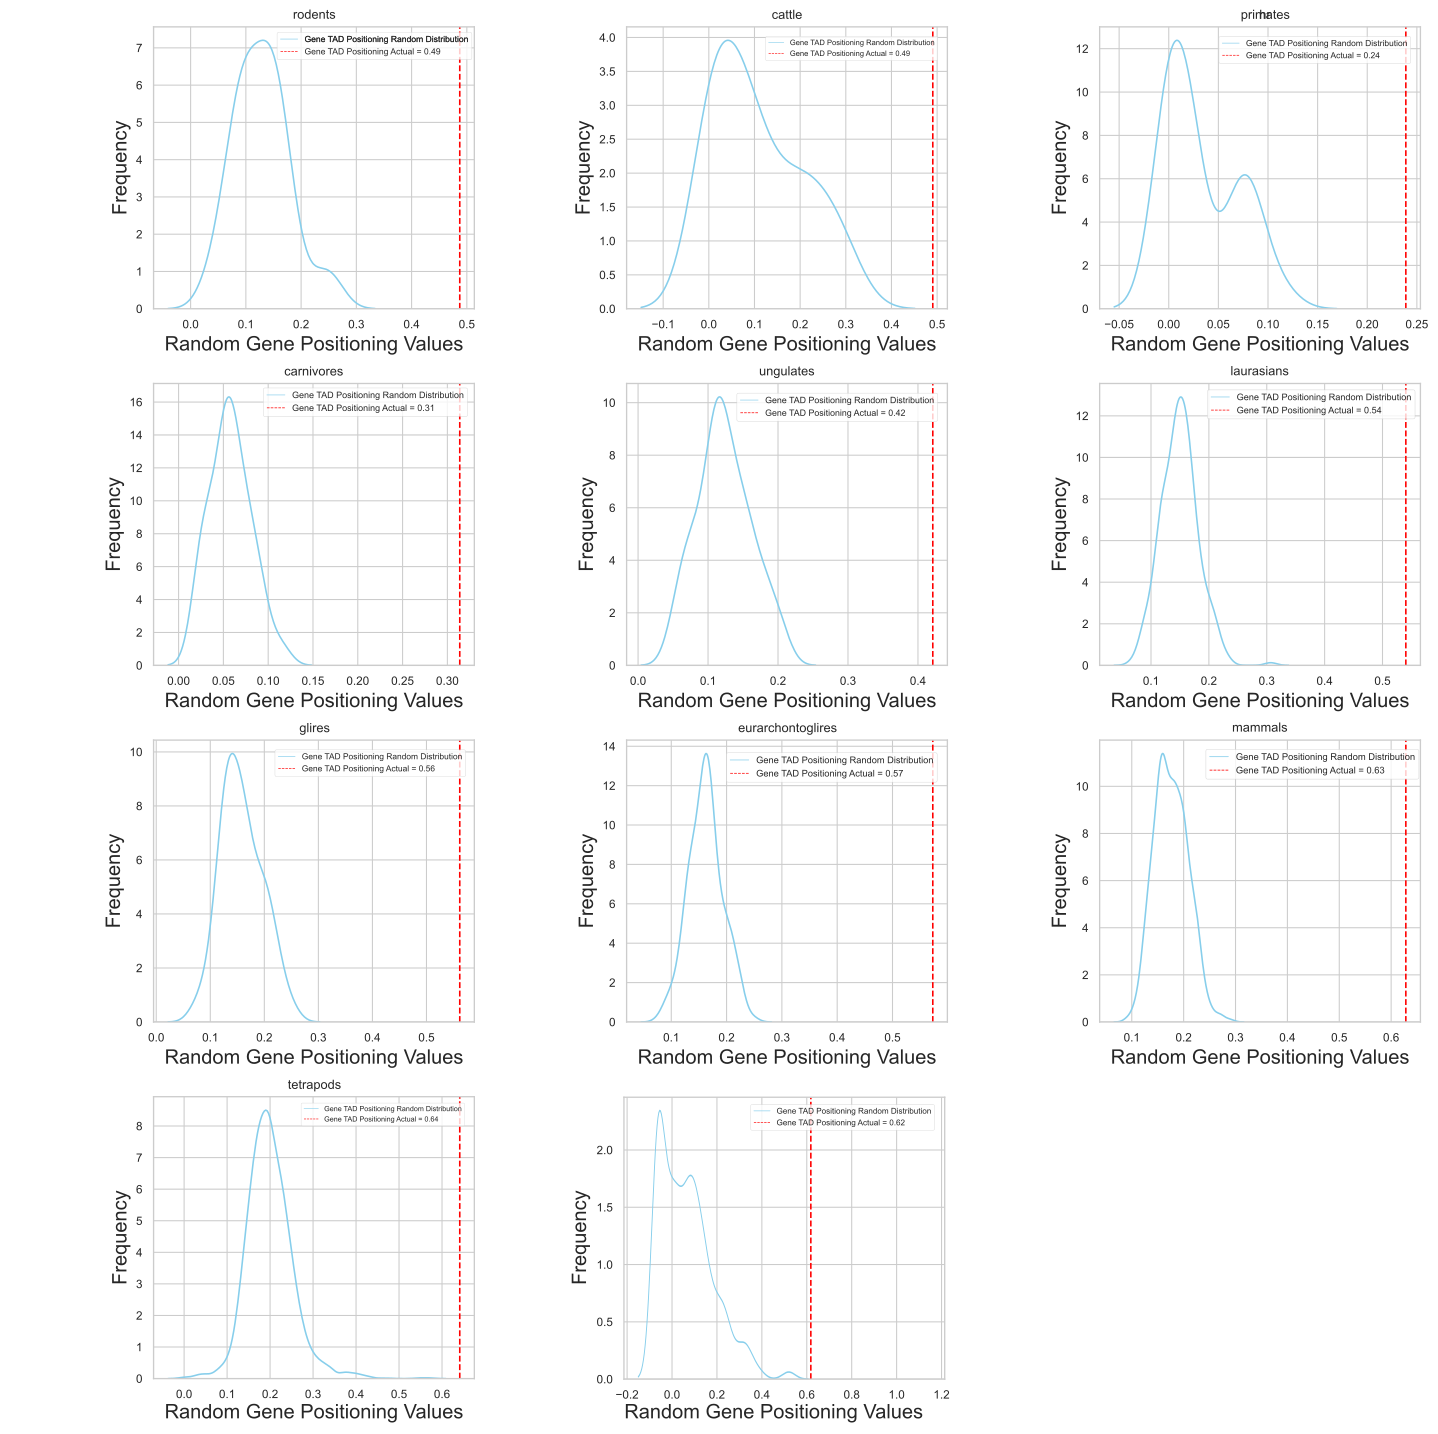


**Figure S10** Distribution of 1,000 randomly generated Gene-TAD Positioning for each clade. The red vertical line represents the observed Gene-TAD Positioning value.


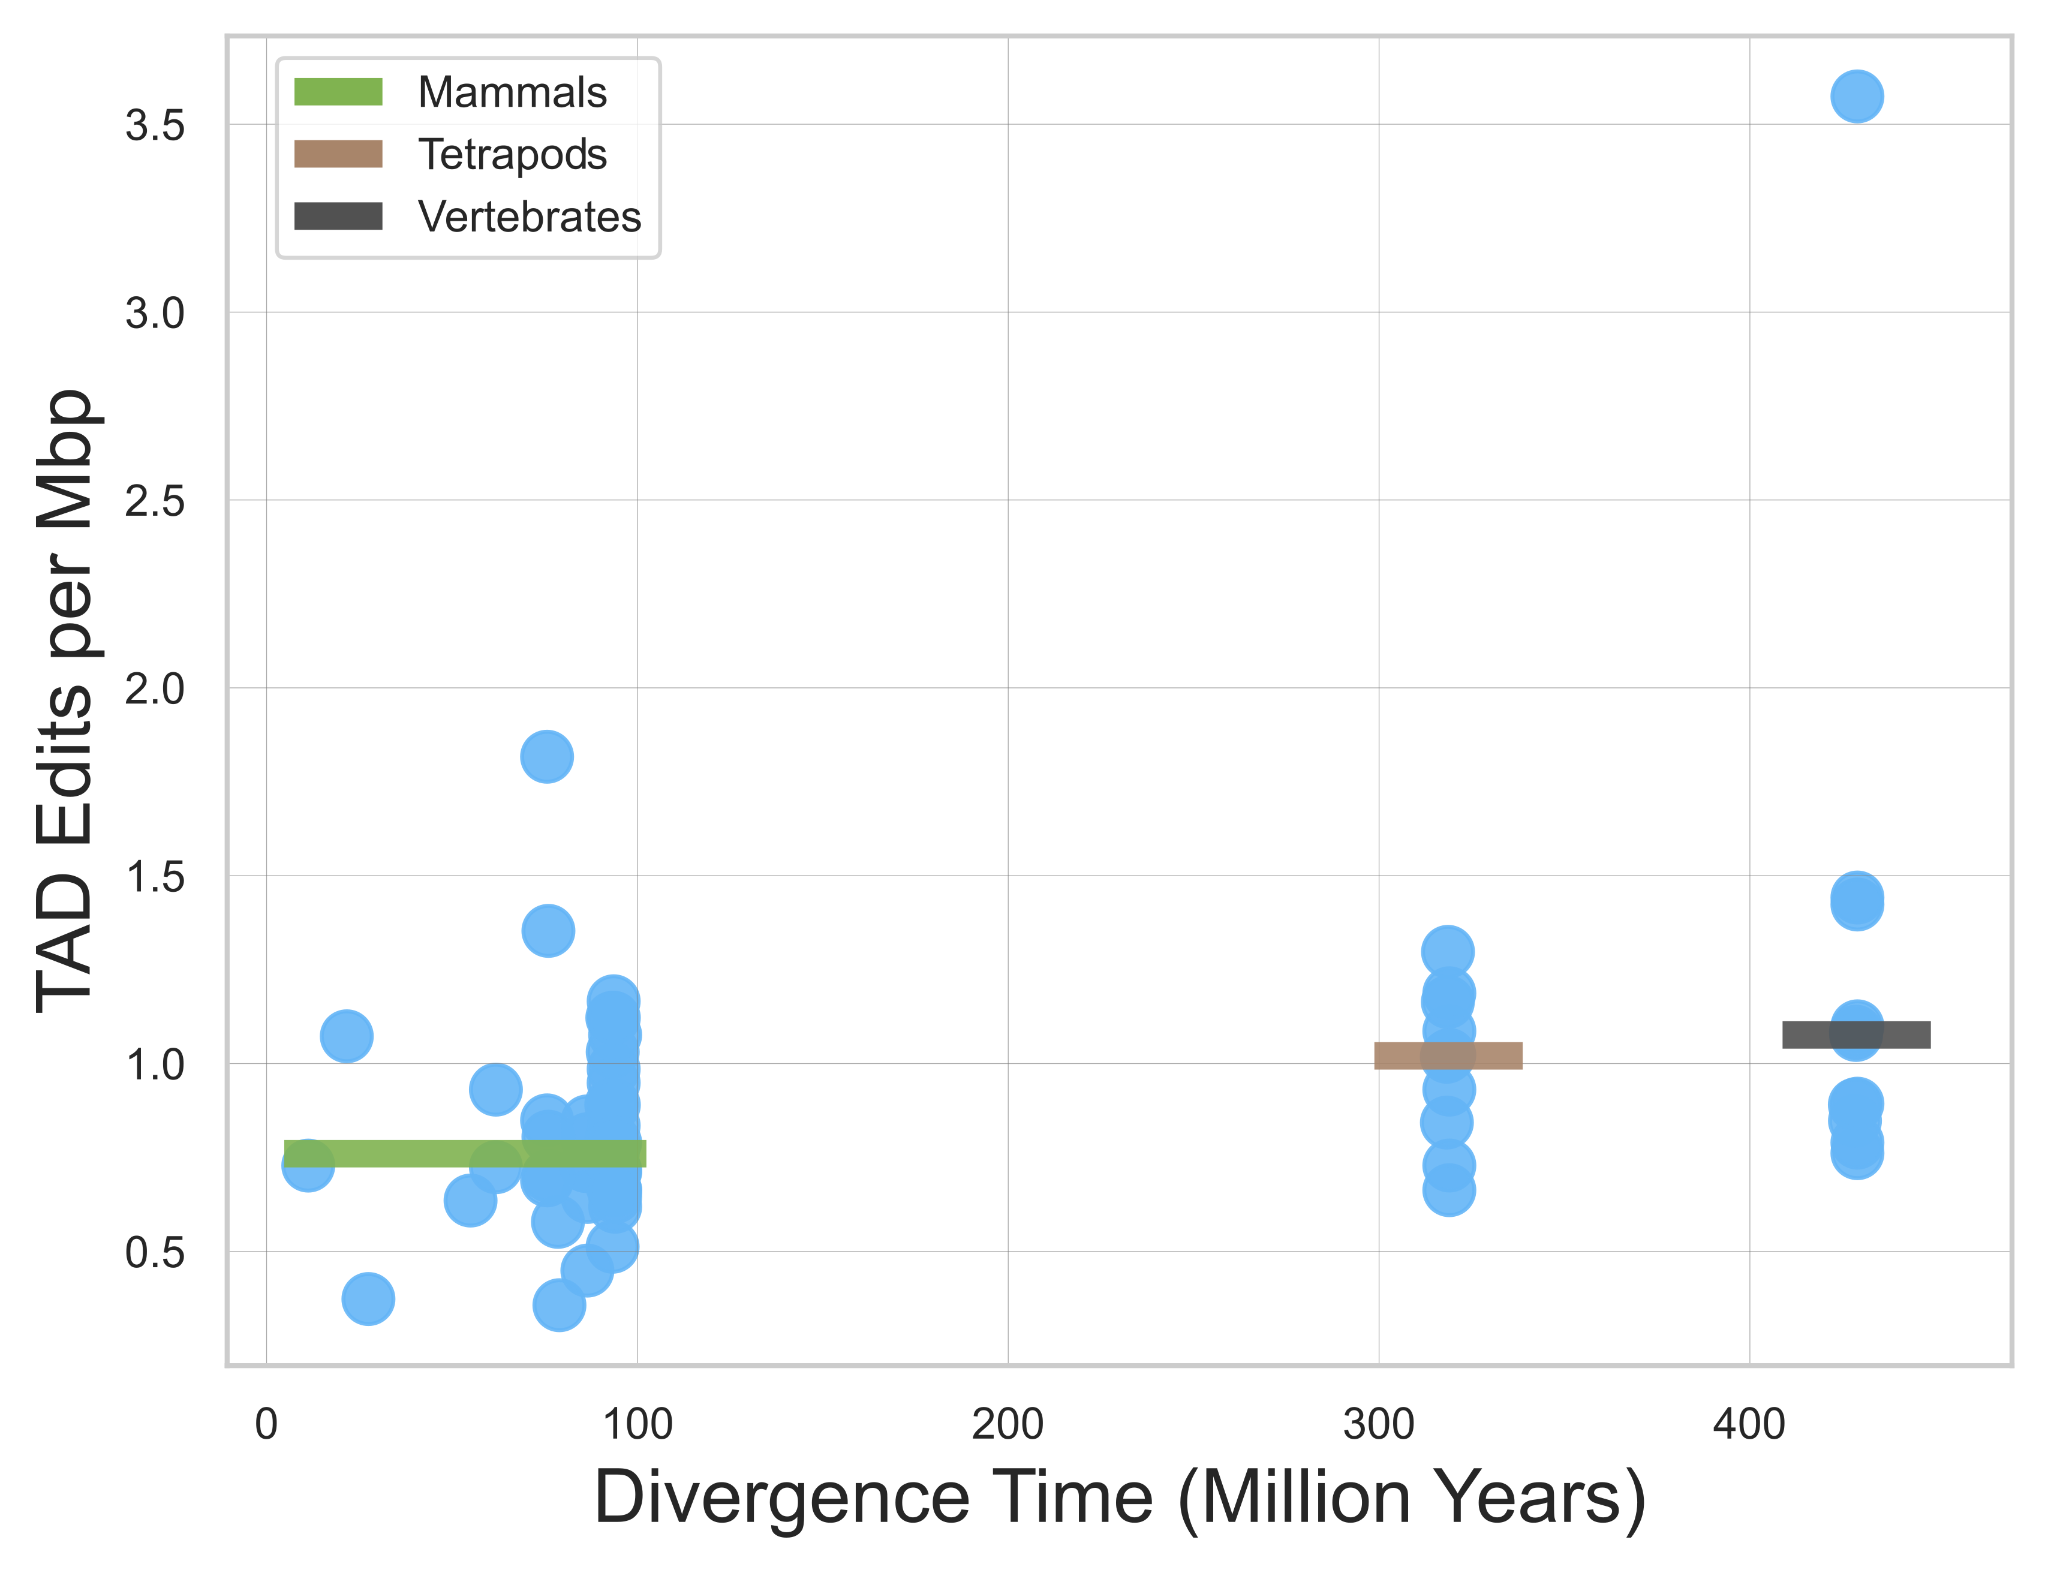


**Figure S11** Scatterplot showing the difference in TAD edits per Mbp within syntenic blocks as a function of evolutionary distance between species . The three lines represent the mean edits in three different clades: mammals (green), tetrapods (brown), and vertebrates (black).


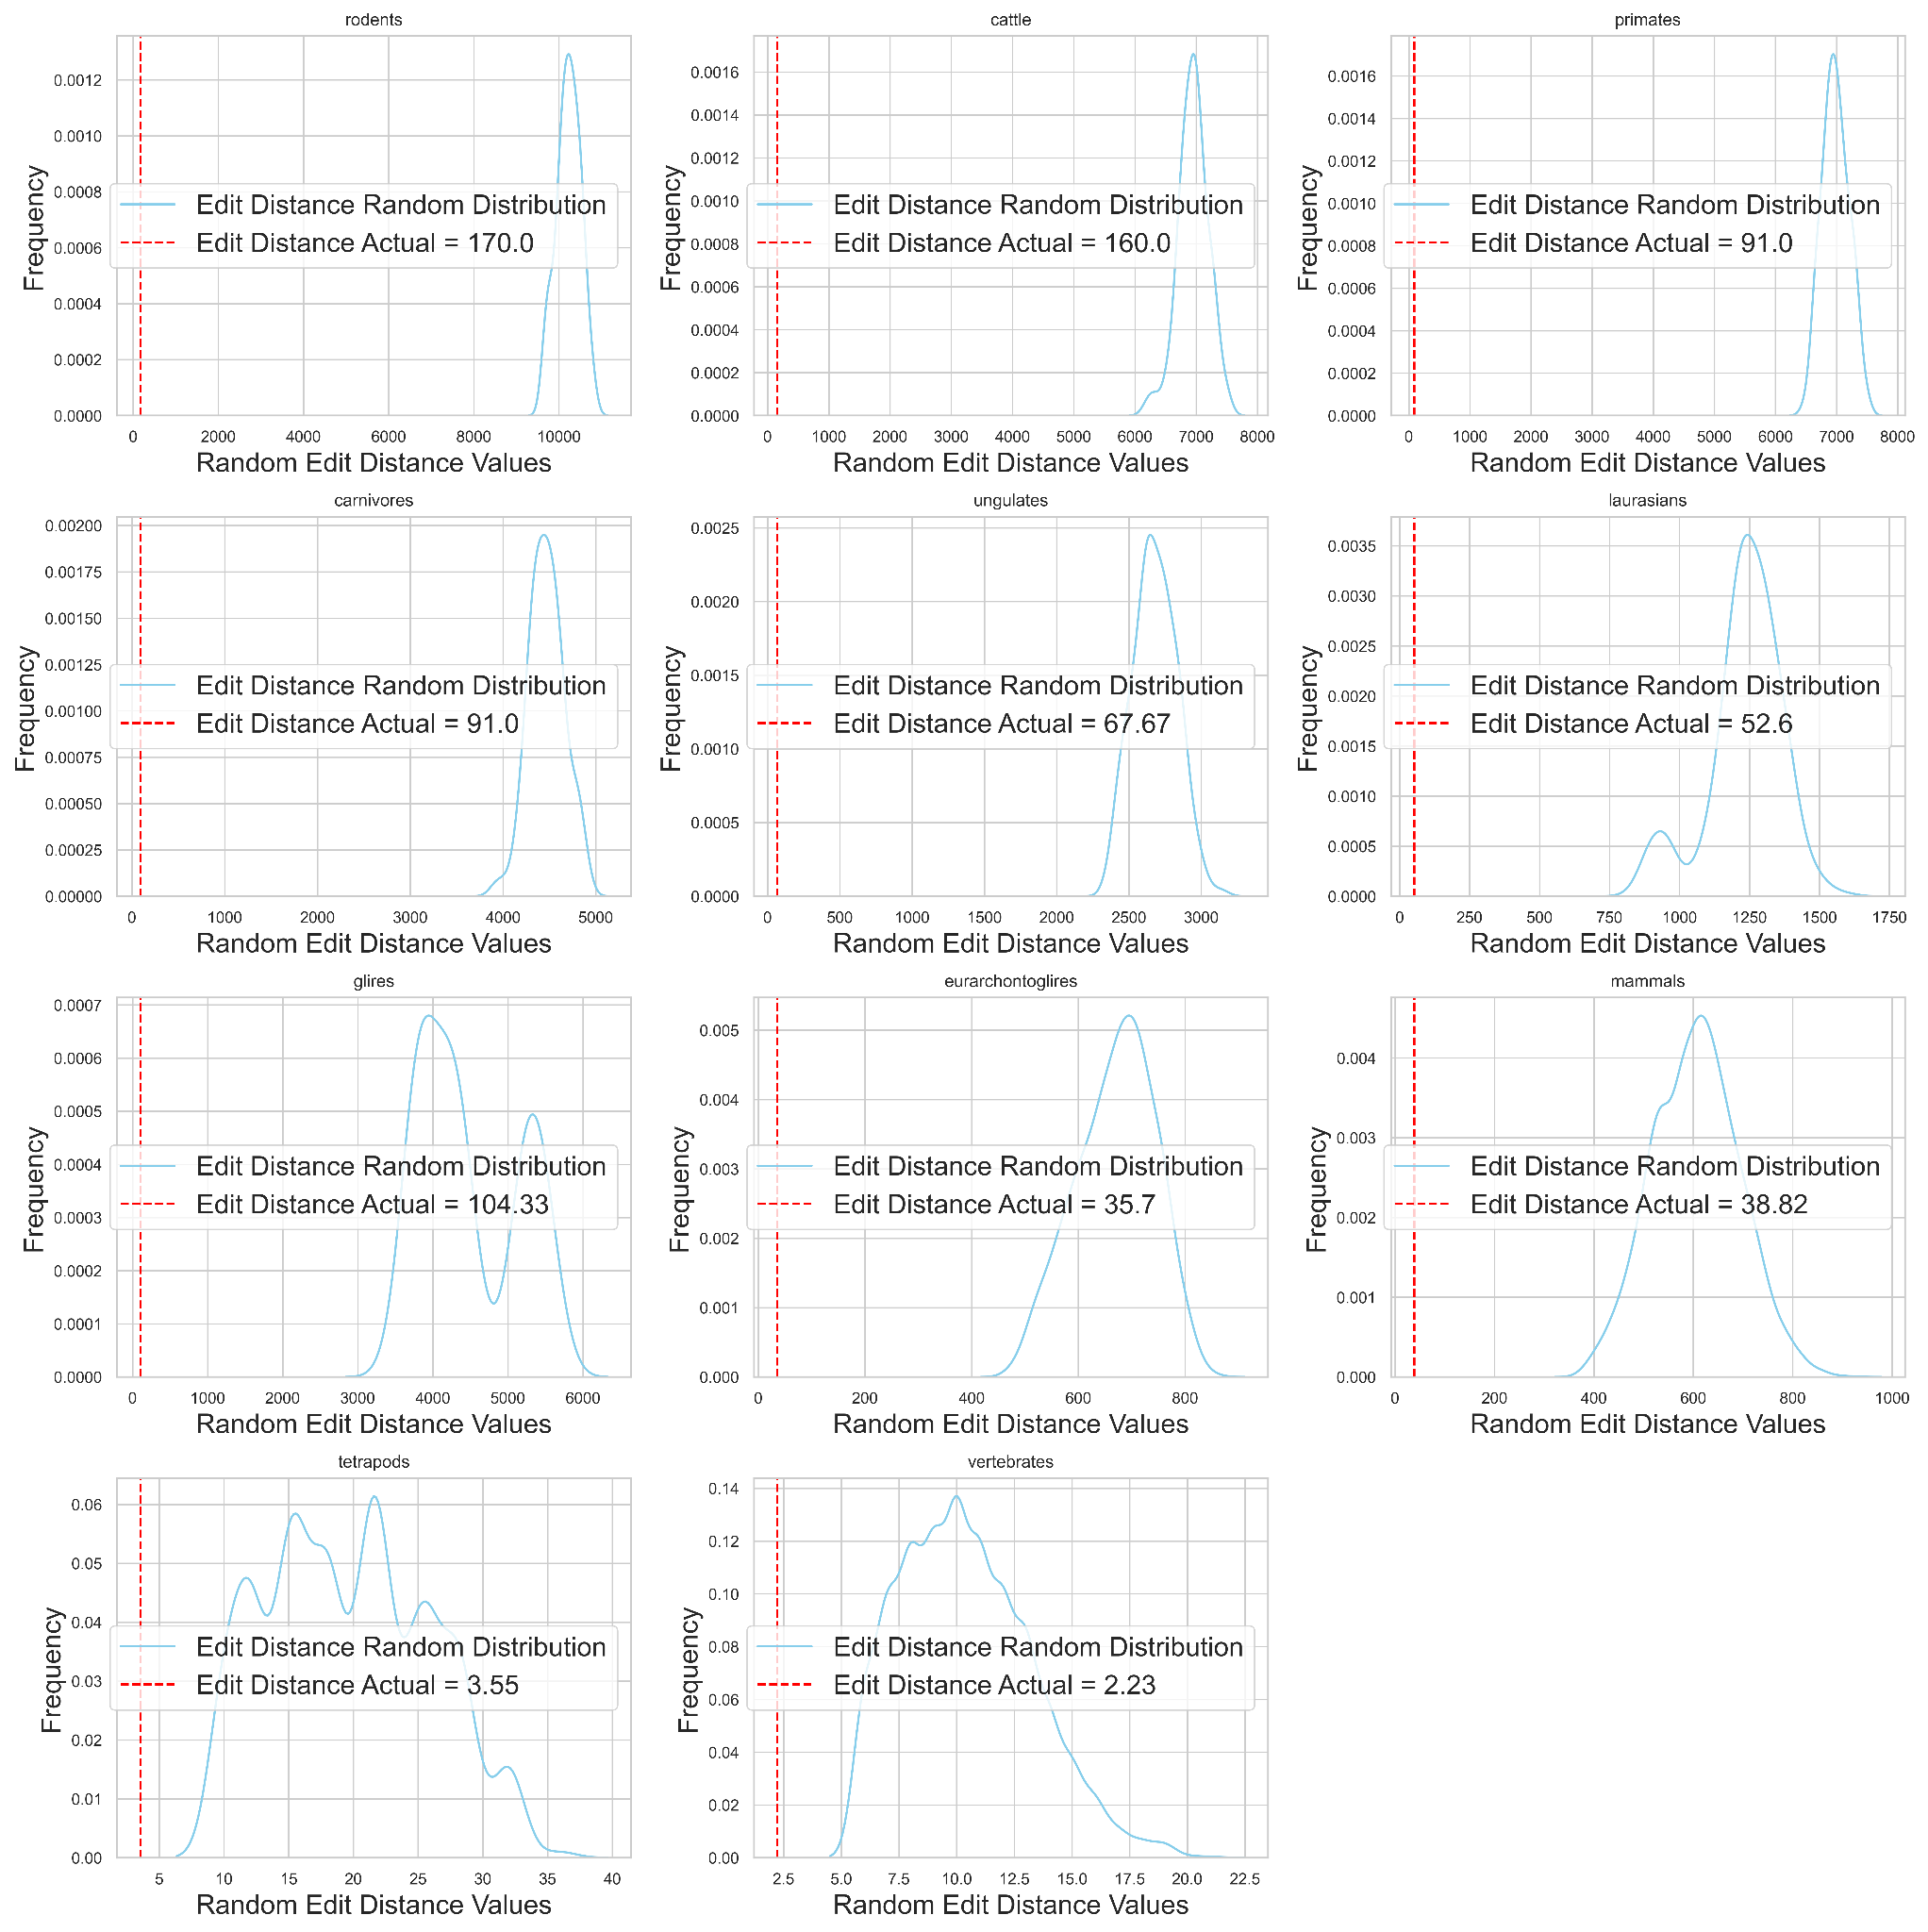


**Figure S12** Distribution of 1,000 randomly generated Edit Distance for each clade. The red vertical line represents the observed Edit Distance value.

**
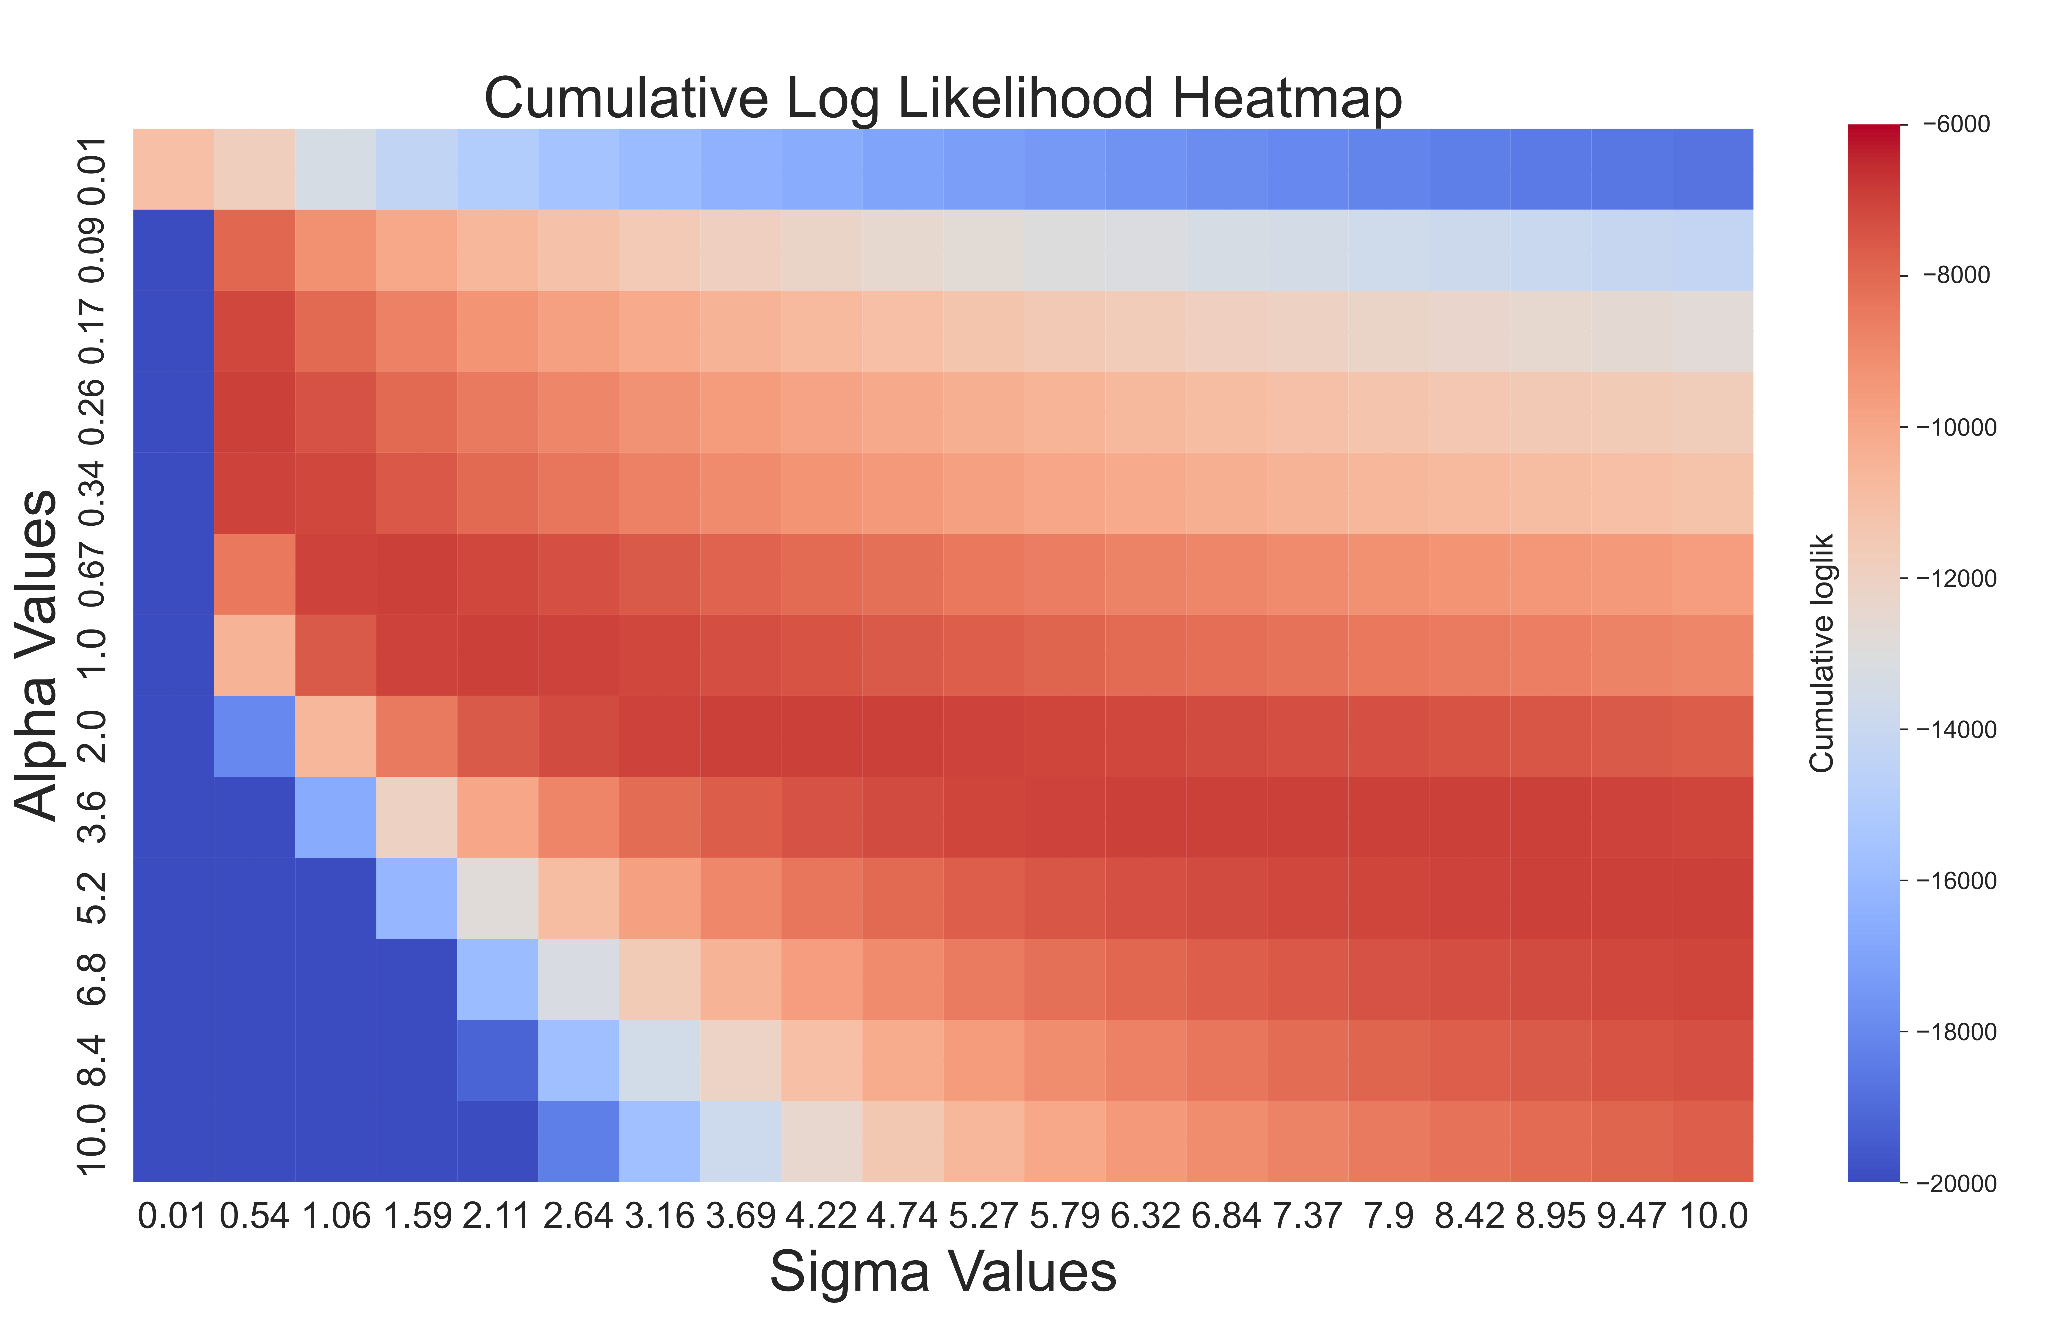
**

**Figure S13** Heatmap displaying the cumulative log-likelihood values for different alpha and sigma pairs.

**
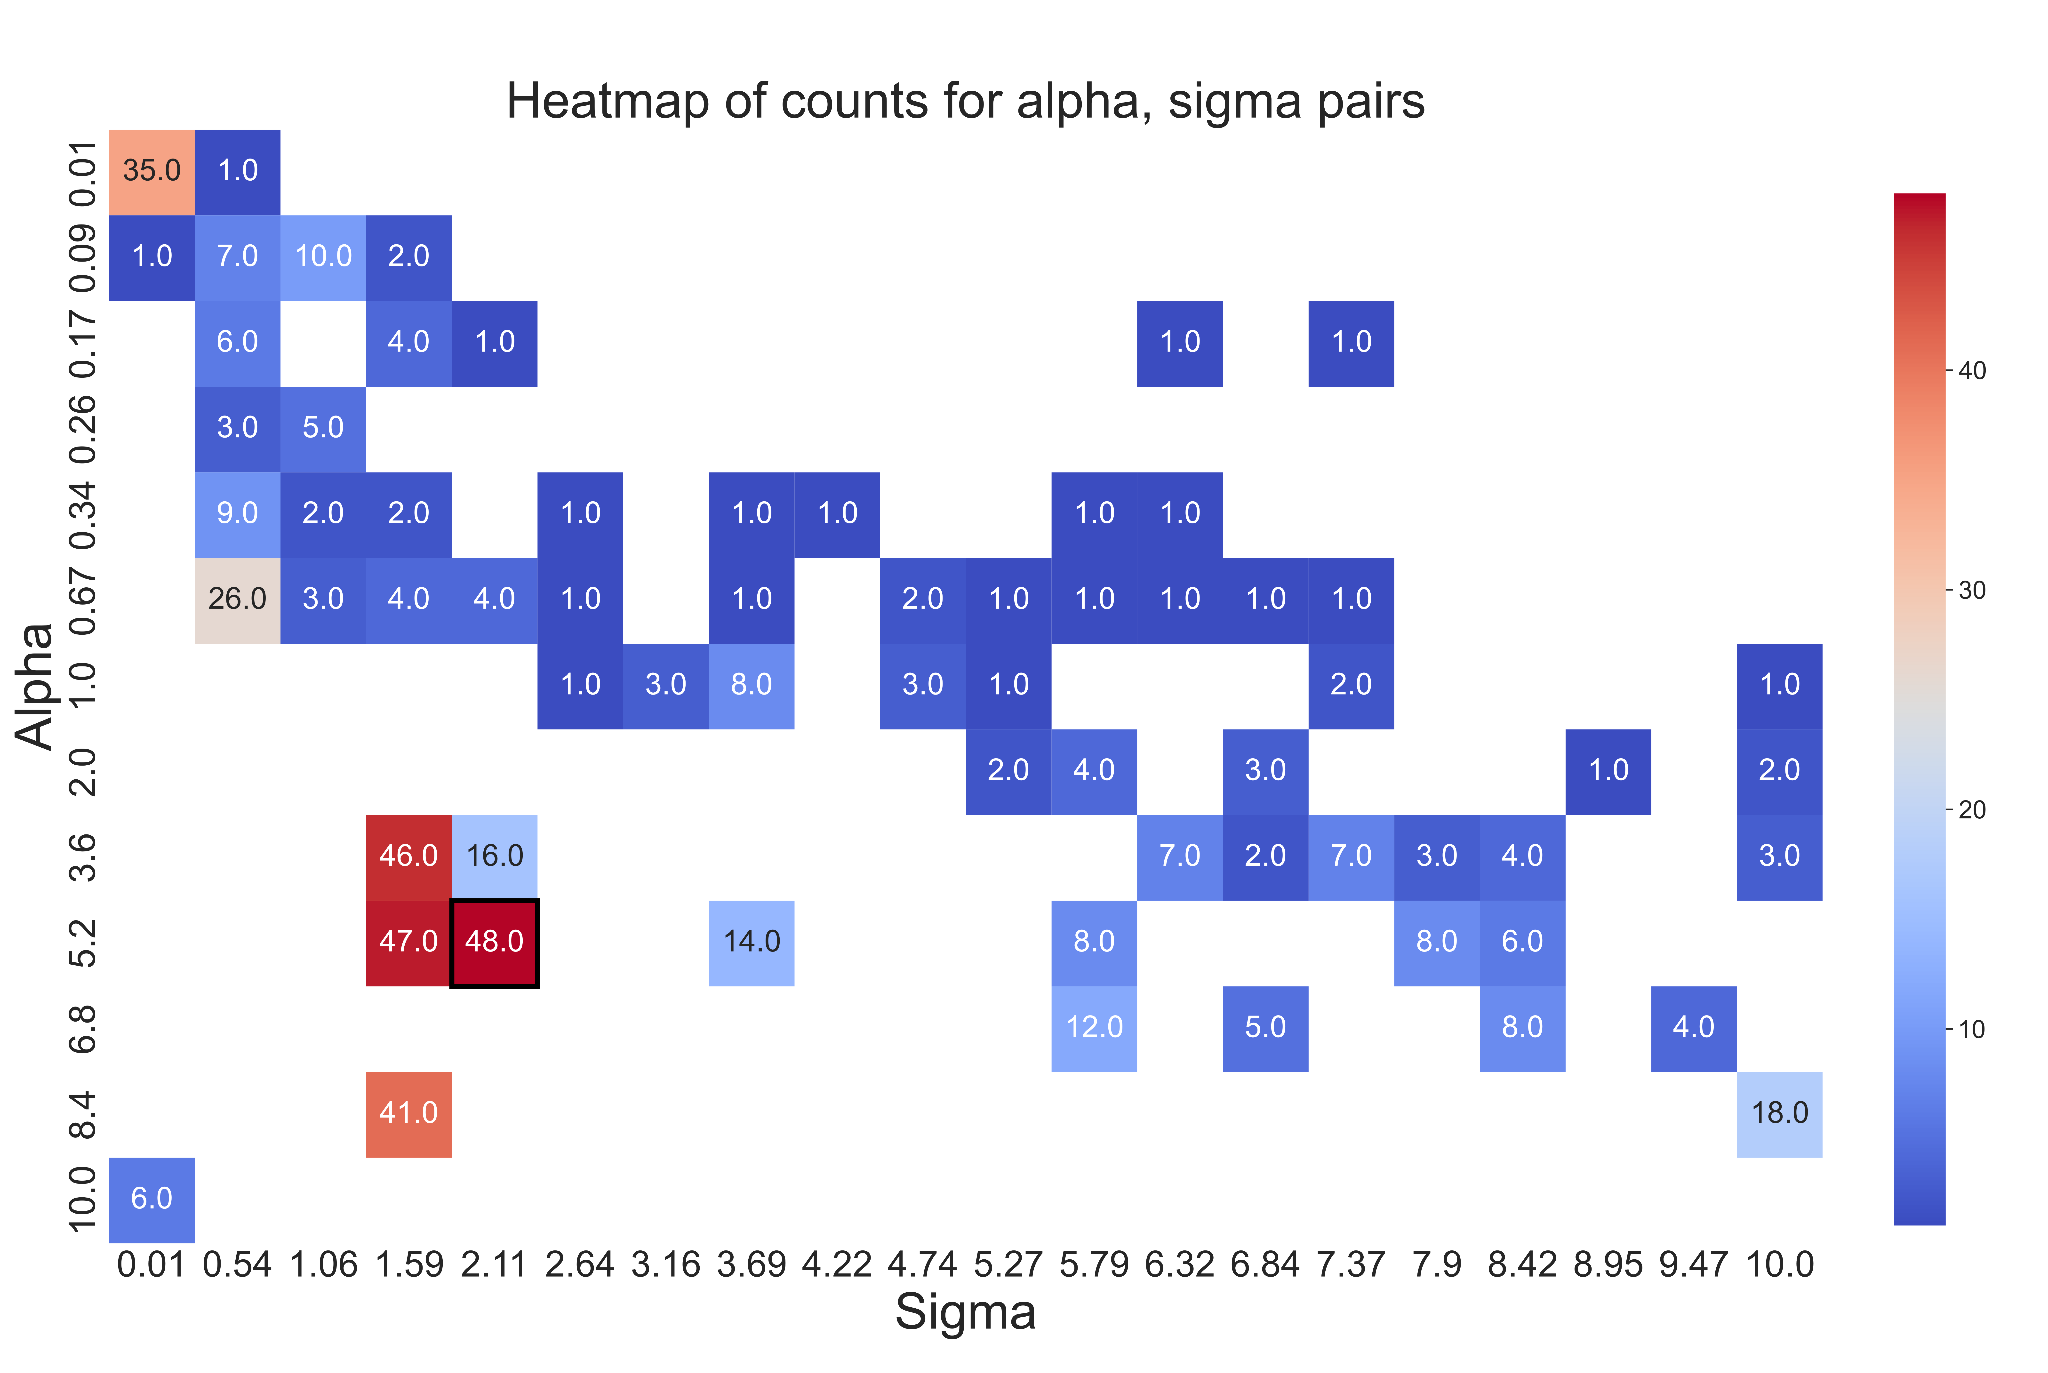
**

**Figure S14** Frequency of alpha and sigma pairs, with the optimal pair being (5.2, 2.11)

**
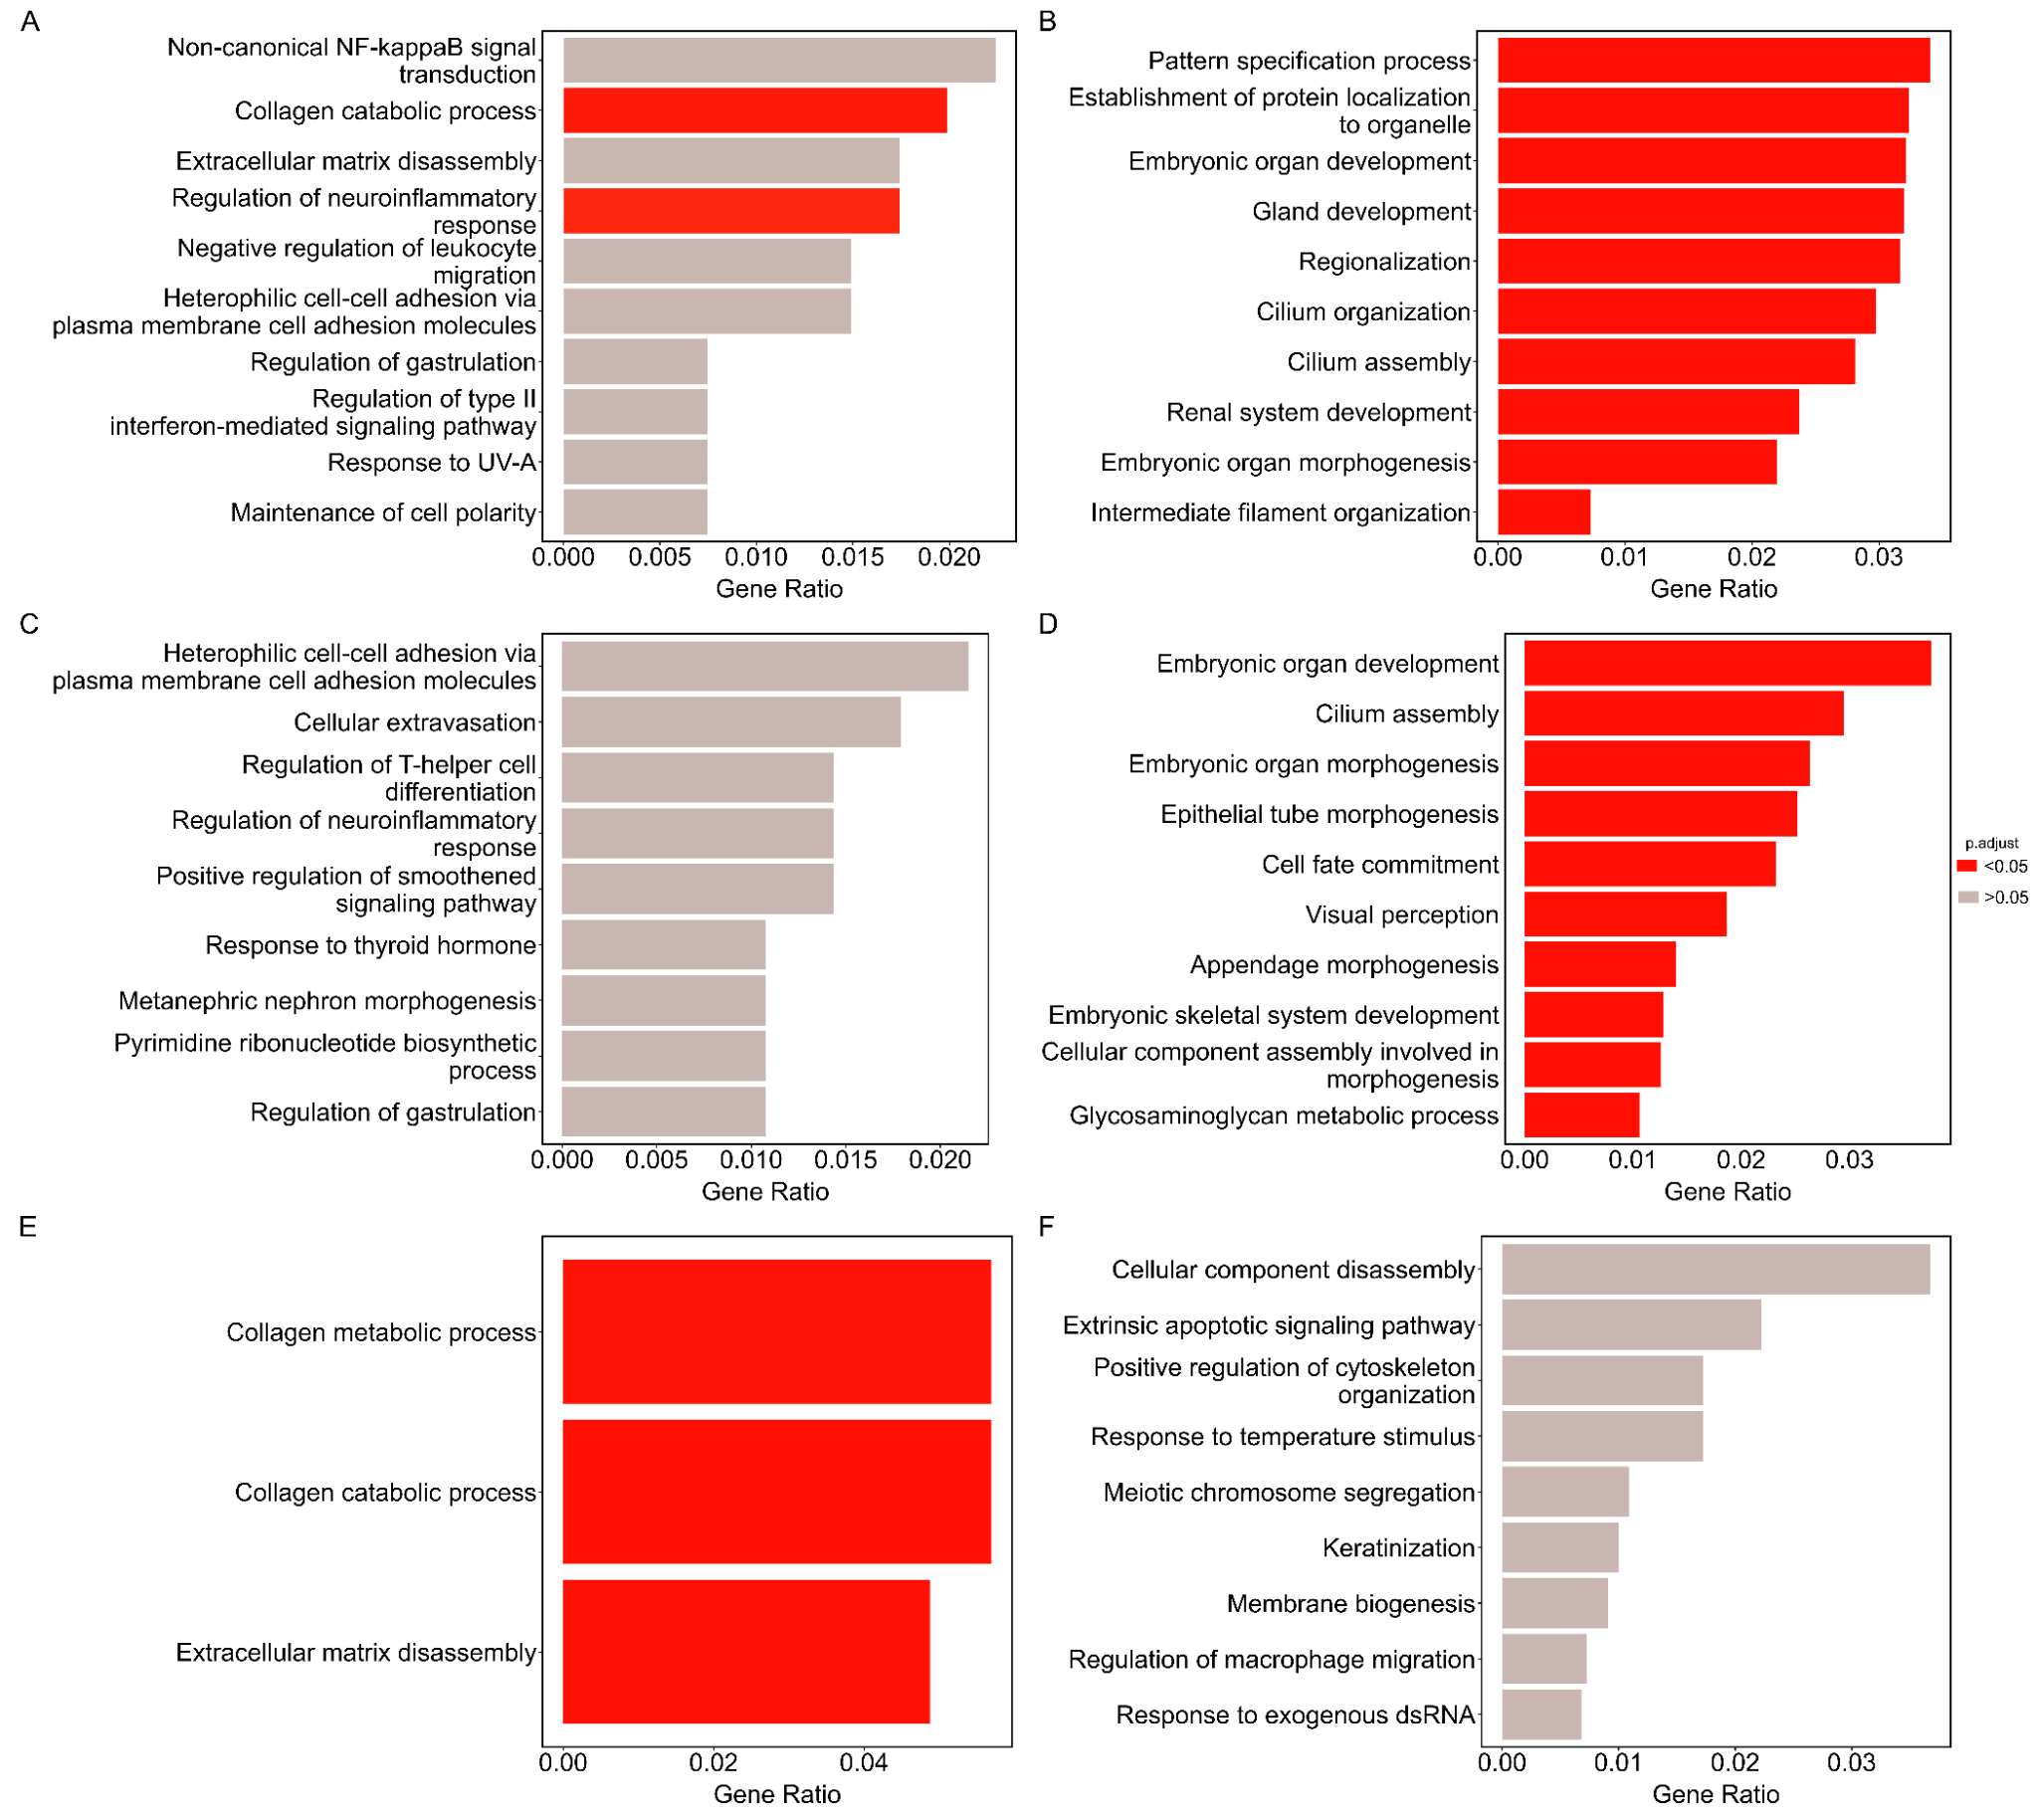
**

**Figure S15** GO term analysis for genes in syntenic blocks with different alpha values and the presence of GRBs. **A** GO terms for genes in low-alpha (0.01, 439 genes) syntenic blocks. **B** GO terms for genes in high-alpha (>0.01, 8092 genes) syntenic blocks. **C** GO terms for genes in low-alpha syntenic blocks with at least one GRB (306 genes). **D** GO terms for genes in high-alpha syntenic blocks with at least one GRB (5678 genes). **E** GO terms for genes in low-alpha syntenic blocks without GRBs (133 genes). **F** GO terms for genes in high-alpha syntenic blocks without GRBs (2415 genes). GO terms are ordered by gene ratio, and p-values are adjusted for multiple testing.


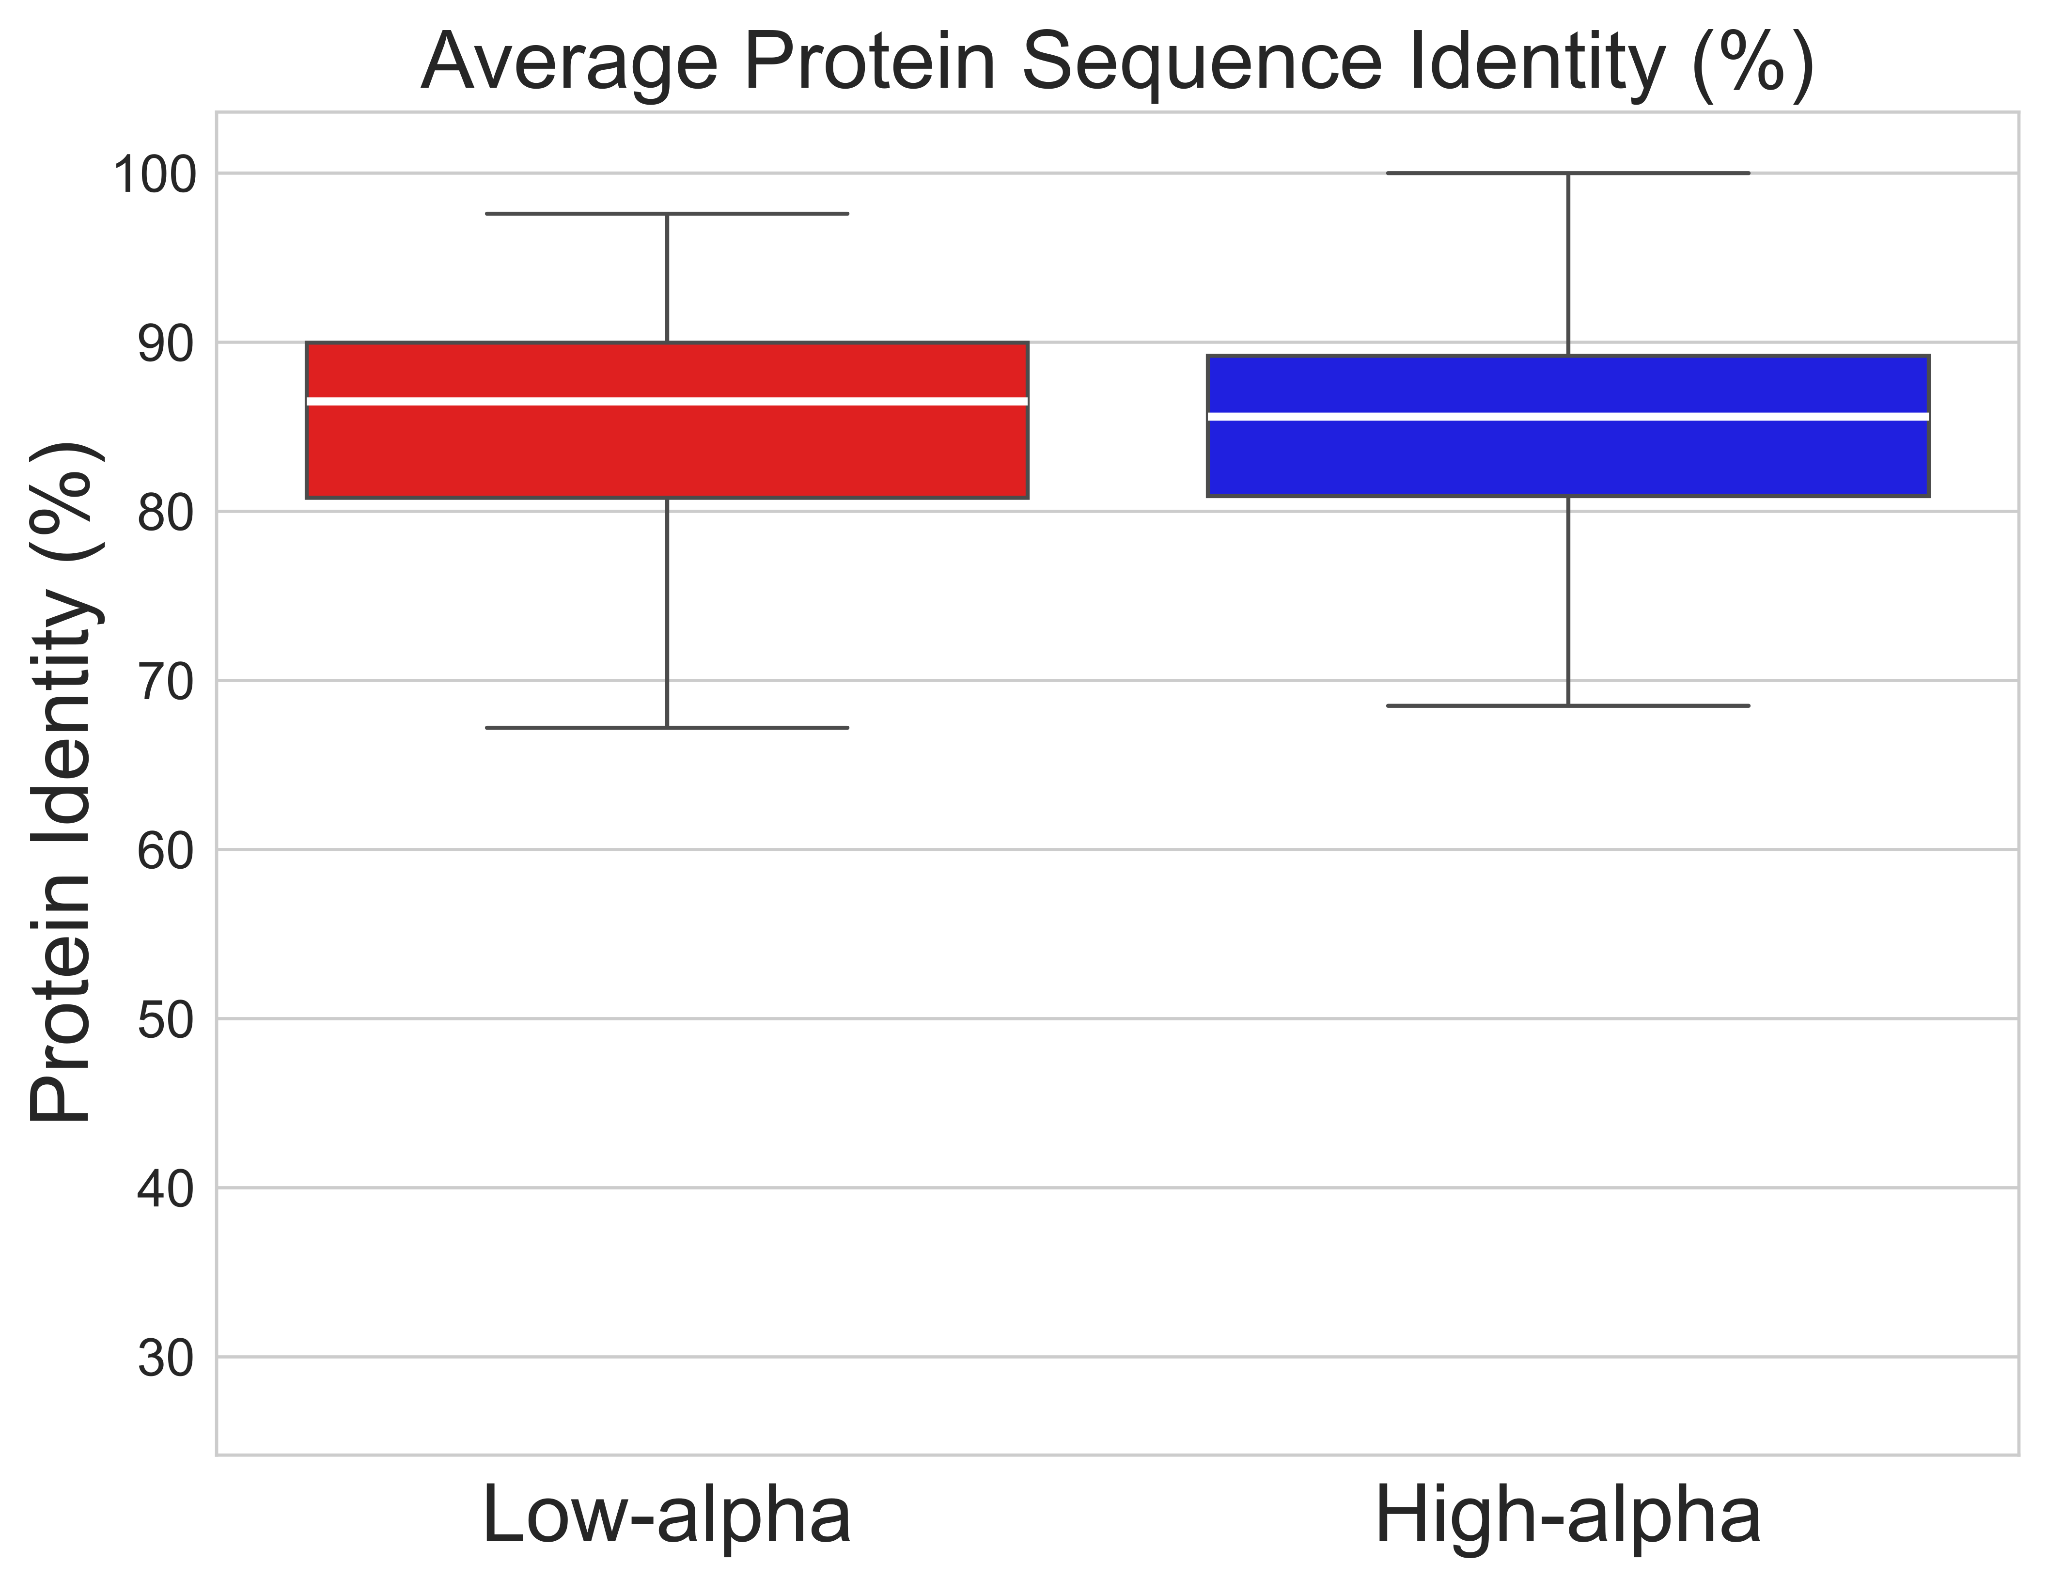


**Figure S16** The boxplot shows the distribution of average percentage identity of protein sequences between species for genes located in low-alpha (red) and high-alpha (blue) genomic blocks.
