# Supplementary material for: TAD conservation in vertebrate genomes is driven by stabilising selection.
Source: Research Square preprint supplement (doi:10.21203/rs.3.rs-5809117/v1), 2025-04-03
Supplement: Supplementary file 2 [file aeaaee6c43cd03238923a993.docx]

**SUPPLEMENTARY TABLES**

**Table S1** Summary statistics of syntenic blocks§

| **taxon** | **Minimum** | **Maximum** | **IQR** | **Mean** | **Median** | **std** | **Coverage** |
| --- | --- | --- | --- | --- | --- | --- | --- |
| **Rodents** | 2 | 1767 | 136.5 | 188.19 | 31 | 369.31 | 0.95 |
| **Cattle** | 3 | 1271 | 334 | 227.12 | 17 | 360.15 | 0.98 |
| **Primates** | 2 | 1517 | 275 | 214.82 | 47 | 341.37 | 0.97 |
| **Carnivores** | 2 | 1021 | 129 | 103.40 | 12 | 176.16 | 0.97 |
| **Ungulates** | 2 | 718 | 66.25 | 70.32 | 20 | 122.57 | 0.91 |
| **Laurasians** | 2 | 567 | 41 | 40.30 | 12.5 | 70.63 | 0.79 |
| **Glires** | 2 | 949 | 39.5 | 41.05 | 15 | 87.32 | 0.62 |
| **Eurarchontoglires** | 2 | 505 | 31.25 | 31.93 | 14 | 53.54 | 0.57 |
| **Mammals** | 2 | 245 | 17 | 19.13 | 8 | 29.27 | 0.43 |
| **Tetrapoda** | 2 | 125 | 8 | 9.27 | 5 | 11.38 | 0.26 |
| **Vertebrates** | 2 | 16 | 2 | 4.28 | 3 | 2.27 | 0.05 |

## §This table provides a statistical overview of syntenic blocks for each taxonomic group alignment, detailing the minimum and maximum number of genes, interquartile range (IQR), median, standard deviation (std), and average coverage of syntenic genes for each clade.

**Table S2** Summary of Missing Genes in Vertebrates Alignment for Tetrapods §

| **Category** | **Total** | **>70% Protein Identity** | **>80% Protein Identity** |
| --- | --- | --- | --- |
| **Total number of genes in Tetrapods missing in vertebrates alignment** | 4194 | 4194 | 4194 |
| **Number of genes explained by non-syntenic paralogy** | 3723 | 1425 | 627 |
| **Number of genes not explained by non-syntenic paralogy**# | 471 | 2769 | 3567 |

§This table shows the total number of genes present in the tetrapod alignment but absent in the vertebrate alignment. It also indicates how many of these genes potentially are explained by alternative orthologs and how many are not.

#Among these are tetrapod-specific genes such as keratins.

**Table S3** Coverage of tads within syntenic blocks across clades§

| **taxon** | **Human** | **Rhesus** | **Mouse** | **Rat** | **Rabbit** | **Cat** | **Dog** | **Cow** | **Sheep** | **Pig** | **Chicken** | **Zebrafish** |
| --- | --- | --- | --- | --- | --- | --- | --- | --- | --- | --- | --- | --- |
| **Rodents** |  |  | 0.996 | 0.992 |  |  |  |  |  |  |  |  |
| **Cattle** |  |  |  |  |  |  |  | 1.0 | 1.0 |  |  |  |
| **Primates** | 0.997 | 0.999 |  |  |  |  |  |  |  |  |  |  |
| **Carnivores** |  |  |  |  |  | 0.949 | 0.946 |  |  |  |  |  |
| **Ungulates** |  |  |  |  |  |  |  | 0.991 | 0.99 | 0.999 |  |  |
| **Laurasians** |  |  |  |  |  | 0.845 | 0.856 | 0.852 | 0.854 | 0.85 |  |  |
| **Glires** |  |  | 0.815 | 0.811 | 0.887 |  |  |  |  |  |  |  |
| **Eurarchontoglires** | 0.781 | 0.765 | 0.76 | 0.758 | 0.827 |  |  |  |  |  |  |  |
| **Mammals** | 0.574 | 0.55 | 0.556 | 0.549 | 0.588 | 0.566 | 0.579 | 0.552 | 0.577 | 0.57 |  |  |
| **Tetrapoda** | 0.444 | 0.444 | 0.417 | 0.422 | 0.436 | 0.429 | 0.444 | 0.454 | 0.444 | 0.435 | 0.55 |  |
| **Vertebrates** | 0.129 | 0.116 | 0.122 | 0.125 | 0.119 | 0.124 | 0.128 | 0.114 | 0.131 | 0.127 | 0.185 | 0.267 |

§This table shows the proportion of TADs identified within syntenic blocks for each clade.

**Table S4** R² and P-values for TAD border comparison§

| **Taxon** | **R2** | **p-value** |
| --- | --- | --- |
| **Rodents** | 0.746111 | 9.9e-33 |
| **Cattle** | 0.805425 | 1.9e-07 |
| **Primates** | 0.917236 | 8.8e-42 |
| **Carnivores** | 0.901306 | 3.6e-122 |
| **Ungulates** | 0.799365 | 6.1e-242 |
| **Laurasians** | 0.737326 | 0.0e+00 |
| **Glires** | 0.652018 | 1.5e-146 |
| **Eurarchontoglires** | 0.668365 | 0.0e+00 |
| **Mammals** | 0.563330 | 0.0e+00 |
| **Tetrapoda** | 0.342046 | 0.0e+00 |

§This table shows the R² values and corresponding p-values for the comparison of TAD borders within syntenic blocks with the same number of TADs across the different clades.

**Table S5** Syntenic blocks statistics across different 𝛼 values§

| **Alpha Values** | **Number Of**  **Blocks** | **Average Number Of Genes Per Mb** | **Average Number Of Tads Per Mbp** |
| --- | --- | --- | --- |
| **0.01** | 36 | 18.49 | 6.2 |
| **0.09** | 20 | 7.7 | 1.63 |
| **0.17** | 13 | 7.74 | 1.48 |
| **0.26** | 8 | 8.91 | 1.84 |
| **0.34** | 18 | 7.27 | 1.8 |
| **0.67** | 46 | 9.35 | 2.41 |
| **1.0** | 19 | 7.47 | 1.72 |
| **2.0** | 12 | 8.53 | 1.78 |
| **3.6** | 88 | 15.06 | 4.07 |
| **5.2** | 131 | 21.41 | 6.5 |
| **6.8** | 29 | 12.98 | 2.66 |
| **8.4** | 59 | 21.21 | 6.44 |
| **10.0** | 6 | 41.2 | 12.07 |

§This table shows the genomic characteristics for different 𝛼 values. The columns include the number of syntenic blocks, the average number of genes per megabase pair (Mbp), and the average number of TADs per megabase pair (Mbp) for each alpha value.

**Table S6** Gene Density in Syntenic Blocks With/Without GRB§

| **Species** | **GRB-TAD in SB** | **Non GRB-TAD in SB** | **GRB-TAD not in SB** | **Non GRB-TAD not in SB** |
| --- | --- | --- | --- | --- |
| **Human** | 12.60 | 20.82 | 6.45 | 9.09 |
| **Rhesus** | 9.83 | 23.58 | 7.01 | 9.26 |
| **Mouse** | 12.55 | 32.74 | 8.24 | 8.32 |
| **Rat** | 13.95 | 34.20 | 8.25 | 9.09 |
| **Cow** | 14.04 | 36.38 | 7.68 | 9.30 |
| **Pig** | 12.74 | 35.95 | 7.79 | 10.61 |
| **Dog** | 12.45 | 40.60 | 9.29 | 10.43 |
| **Zebrafish** | 18.85 | 47.43 | 17.92 | 16.95 |

§This table shows gene density (gene/Mbp) in TADs, both within and outside syntenic blocks, comparing the presence and absence of GRB.
